# Supplementary material
Source: publisher figshare collection journal article supplement (https://acs.figshare.com/ndownloader/files/11153330)
Supplement: Supplementary file 1 [file 11153330]

HEADER    NEUROPEPTIDE                            19-FEB-18   6CG4              
TITLE     COVALENTLY CROSSLINKED TRIMER OF A MACROCYCLIC PEPTIDE DERIVED FROM   
TITLE    2 ABETA(17-36) - (ORN)LCVFFCED(ORN)AII(2-NITROBENZYLGLYCINE)L(ORN)V    
COMPND    MOL_ID: 1;                                                            
COMPND   2 MOLECULE: ORN-CYS-VAL-PHE-PHE-CYS-GLU-ASP-ORN-ALA-ILE-ILE-EZY-LEU-   
COMPND   3 ORN-VAL;                                                             
COMPND   4 CHAIN: A, B, C;                                                      
COMPND   5 ENGINEERED: YES                                                      
SOURCE    MOL_ID: 1;                                                            
SOURCE   2 SYNTHETIC: YES;                                                      
SOURCE   3 ORGANISM_SCIENTIFIC: SYNTHETIC CONSTRUCT;                            
SOURCE   4 ORGANISM_TAXID: 32630                                                
KEYWDS    AMYLOID, OLIGOMER, ALZHEIMER'S DISEASE, ABETA, NEUROPEPTIDE           
EXPDTA    X-RAY DIFFRACTION                                                     
AUTHOR    P.J.SALVESON,J.S.NOWICK                                               
JRNL        AUTH   P.J.SALVESON,S.HAERIANARDAKANI,A.THUY-BOUN,A.G.KREUTZER,     
JRNL        AUTH 2 J.S.NOWICK                                                   
JRNL        TITL   IN PROGRESS                                                  
JRNL        REF    TO BE PUBLISHED                                              
JRNL        REFN                                                                
REMARK   2                                                                      
REMARK   2 RESOLUTION.    2.08 ANGSTROMS.                                       
REMARK   3                                                                      
REMARK   3 REFINEMENT.                                                          
REMARK   3   PROGRAM     : PHENIX (1.11.1_2575: ???)                            
REMARK   3   AUTHORS     : PAUL ADAMS,PAVEL AFONINE,VINCENT CHEN,IAN            
REMARK   3               : DAVIS,KRESHNA GOPAL,RALF GROSSE-KUNSTLEVE,           
REMARK   3               : LI-WEI HUNG,ROBERT IMMORMINO,TOM IOERGER,            
REMARK   3               : AIRLIE MCCOY,ERIK MCKEE,NIGEL MORIARTY,              
REMARK   3               : REETAL PAI,RANDY READ,JANE RICHARDSON,               
REMARK   3               : DAVID RICHARDSON,TOD ROMO,JIM SACCHETTINI,           
REMARK   3               : NICHOLAS SAUTER,JACOB SMITH,LAURENT                  
REMARK   3               : STORONI,TOM TERWILLIGER,PETER ZWART                  
REMARK   3                                                                      
REMARK   3    REFINEMENT TARGET : NULL                                          
REMARK   3                                                                      
REMARK   3  DATA USED IN REFINEMENT.                                            
REMARK   3   RESOLUTION RANGE HIGH (ANGSTROMS) : 2.08                           
REMARK   3   RESOLUTION RANGE LOW  (ANGSTROMS) : 32.78                          
REMARK   3   MIN(FOBS/SIGMA_FOBS)              : 1.390                          
REMARK   3   COMPLETENESS FOR RANGE        (%) : 98.9                           
REMARK   3   NUMBER OF REFLECTIONS             : 5269                           
REMARK   3                                                                      
REMARK   3  FIT TO DATA USED IN REFINEMENT.                                     
REMARK   3   R VALUE     (WORKING + TEST SET) : 0.211                           
REMARK   3   R VALUE            (WORKING SET) : 0.205                           
REMARK   3   FREE R VALUE                     : 0.263                           
REMARK   3   FREE R VALUE TEST SET SIZE   (%) : 9.740                           
REMARK   3   FREE R VALUE TEST SET COUNT      : 268                             
REMARK   3                                                                      
REMARK   3  FIT TO DATA USED IN REFINEMENT (IN BINS).                           
REMARK   3   BIN  RESOLUTION RANGE  COMPL.    NWORK NFREE   RWORK  RFREE        
REMARK   3     1 32.7870 -  3.3060    1.00     1200   129  0.1864 0.2277        
REMARK   3     2  3.3060 -  2.6244    1.00     1221   115  0.2109 0.2616        
REMARK   3     3  2.6244 -  2.2928    0.98     1165   137  0.2298 0.3152        
REMARK   3     4  2.2928 -  2.0832    0.98     1170   132  0.2229 0.3117        
REMARK   3                                                                      
REMARK   3  BULK SOLVENT MODELLING.                                             
REMARK   3   METHOD USED        : NULL                                          
REMARK   3   SOLVENT RADIUS     : 1.11                                          
REMARK   3   SHRINKAGE RADIUS   : 0.90                                          
REMARK   3   K_SOL              : NULL                                          
REMARK   3   B_SOL              : NULL                                          
REMARK   3                                                                      
REMARK   3  ERROR ESTIMATES.                                                    
REMARK   3   COORDINATE ERROR (MAXIMUM-LIKELIHOOD BASED)     : 0.260            
REMARK   3   PHASE ERROR (DEGREES, MAXIMUM-LIKELIHOOD BASED) : 27.610           
REMARK   3                                                                      
REMARK   3  B VALUES.                                                           
REMARK   3   FROM WILSON PLOT           (A**2) : NULL                           
REMARK   3   MEAN B VALUE      (OVERALL, A**2) : NULL                           
REMARK   3   OVERALL ANISOTROPIC B VALUE.                                       
REMARK   3    B11 (A**2) : NULL                                                 
REMARK   3    B22 (A**2) : NULL                                                 
REMARK   3    B33 (A**2) : NULL                                                 
REMARK   3    B12 (A**2) : NULL                                                 
REMARK   3    B13 (A**2) : NULL                                                 
REMARK   3    B23 (A**2) : NULL                                                 
REMARK   3                                                                      
REMARK   3  TWINNING INFORMATION.                                               
REMARK   3   FRACTION: NULL                                                     
REMARK   3   OPERATOR: NULL                                                     
REMARK   3                                                                      
REMARK   3  DEVIATIONS FROM IDEAL VALUES.                                       
REMARK   3                 RMSD          COUNT                                  
REMARK   3   BOND      :  0.005            421                                  
REMARK   3   ANGLE     :  0.915            563                                  
REMARK   3   CHIRALITY :  0.115             63                                  
REMARK   3   PLANARITY :  0.002             67                                  
REMARK   3   DIHEDRAL  : 26.122            282                                  
REMARK   3                                                                      
REMARK   3  TLS DETAILS                                                         
REMARK   3   NUMBER OF TLS GROUPS  : 3                                          
REMARK   3   TLS GROUP : 1                                                      
REMARK   3    SELECTION: ( CHAIN A AND RESID 1:16 )                             
REMARK   3    ORIGIN FOR THE GROUP (A):  26.3181 -13.5325 -17.9916              
REMARK   3    T TENSOR                                                          
REMARK   3      T11:   0.1395 T22:   0.1368                                     
REMARK   3      T33:   0.0541 T12:  -0.0170                                     
REMARK   3      T13:   0.0304 T23:  -0.0481                                     
REMARK   3    L TENSOR                                                          
REMARK   3      L11:   0.1306 L22:   0.3440                                     
REMARK   3      L33:   0.2640 L12:   0.0525                                     
REMARK   3      L13:   0.1203 L23:   0.0771                                     
REMARK   3    S TENSOR                                                          
REMARK   3      S11:   0.0206 S12:   0.0089 S13:  -0.0098                       
REMARK   3      S21:  -0.0295 S22:  -0.1153 S23:   0.0773                       
REMARK   3      S31:   0.0579 S32:   0.0174 S33:  -0.6756                       
REMARK   3   TLS GROUP : 2                                                      
REMARK   3    SELECTION: ( CHAIN B AND RESID 1:16 )                             
REMARK   3    ORIGIN FOR THE GROUP (A):  19.9321  -5.1678 -27.4955              
REMARK   3    T TENSOR                                                          
REMARK   3      T11:   0.2797 T22:   0.1645                                     
REMARK   3      T33:   0.1497 T12:  -0.0134                                     
REMARK   3      T13:  -0.0602 T23:   0.0315                                     
REMARK   3    L TENSOR                                                          
REMARK   3      L11:   4.5704 L22:   2.6127                                     
REMARK   3      L33:   4.4121 L12:   1.5957                                     
REMARK   3      L13:   0.8453 L23:   1.0343                                     
REMARK   3    S TENSOR                                                          
REMARK   3      S11:  -0.0849 S12:   0.2044 S13:   0.3790                       
REMARK   3      S21:  -0.1211 S22:   0.0368 S23:   0.1451                       
REMARK   3      S31:  -0.4498 S32:  -0.2212 S33:   0.1241                       
REMARK   3   TLS GROUP : 3                                                      
REMARK   3    SELECTION: ( CHAIN C AND RESID 1:16 )                             
REMARK   3    ORIGIN FOR THE GROUP (A):  12.2778 -12.4634 -18.1216              
REMARK   3    T TENSOR                                                          
REMARK   3      T11:   0.1565 T22:   0.1521                                     
REMARK   3      T33:   0.2196 T12:   0.0359                                     
REMARK   3      T13:   0.0030 T23:   0.0234                                     
REMARK   3    L TENSOR                                                          
REMARK   3      L11:   0.1473 L22:   2.6221                                     
REMARK   3      L33:   3.3959 L12:  -0.5268                                     
REMARK   3      L13:   0.5903 L23:  -2.9808                                     
REMARK   3    S TENSOR                                                          
REMARK   3      S11:   0.2118 S12:   0.1169 S13:   0.1156                       
REMARK   3      S21:  -0.1131 S22:   0.0499 S23:   0.5659                       
REMARK   3      S31:  -0.0076 S32:  -0.0628 S33:  -0.1848                       
REMARK   3                                                                      
REMARK   3  NCS DETAILS                                                         
REMARK   3   NUMBER OF NCS GROUPS : NULL                                        
REMARK   3                                                                      
REMARK   3  OTHER REFINEMENT REMARKS: NULL                                      
REMARK   4                                                                      
REMARK   4 6CG4 COMPLIES WITH FORMAT V. 3.30, 13-JUL-11                         
REMARK 100                                                                      
REMARK 100 THIS ENTRY HAS BEEN PROCESSED BY RCSB ON 20-FEB-18.                  
REMARK 100 THE DEPOSITION ID IS D_1000232690.                                   
REMARK 200                                                                      
REMARK 200 EXPERIMENTAL DETAILS                                                 
REMARK 200  EXPERIMENT TYPE                : X-RAY DIFFRACTION                  
REMARK 200  DATE OF DATA COLLECTION        : 24-DEC-16                          
REMARK 200  TEMPERATURE           (KELVIN) : 150                                
REMARK 200  PH                             : NULL                               
REMARK 200  NUMBER OF CRYSTALS USED        : 1                                  
REMARK 200                                                                      
REMARK 200  SYNCHROTRON              (Y/N) : N                                  
REMARK 200  RADIATION SOURCE               : ROTATING ANODE                     
REMARK 200  BEAMLINE                       : NULL                               
REMARK 200  X-RAY GENERATOR MODEL          : RIGAKU MICROMAX-007 HF             
REMARK 200  MONOCHROMATIC OR LAUE    (M/L) : M                                  
REMARK 200  WAVELENGTH OR RANGE        (A) : 1.54                               
REMARK 200  MONOCHROMATOR                  : NULL                               
REMARK 200  OPTICS                         : NULL                               
REMARK 200                                                                      
REMARK 200  DETECTOR TYPE                  : CCD                                
REMARK 200  DETECTOR MANUFACTURER          : RIGAKU SATURN 92                   
REMARK 200  INTENSITY-INTEGRATION SOFTWARE : XDS                                
REMARK 200  DATA SCALING SOFTWARE          : AIMLESS                            
REMARK 200                                                                      
REMARK 200  NUMBER OF UNIQUE REFLECTIONS   : 5269                               
REMARK 200  RESOLUTION RANGE HIGH      (A) : 2.030                              
REMARK 200  RESOLUTION RANGE LOW       (A) : 32.800                             
REMARK 200  REJECTION CRITERIA  (SIGMA(I)) : NULL                               
REMARK 200                                                                      
REMARK 200 OVERALL.                                                             
REMARK 200  COMPLETENESS FOR RANGE     (%) : 100.0                              
REMARK 200  DATA REDUNDANCY                : 28.80                              
REMARK 200  R MERGE                    (I) : NULL                               
REMARK 200  R SYM                      (I) : NULL                               
REMARK 200  <I/SIGMA(I)> FOR THE DATA SET  : 33.1000                            
REMARK 200                                                                      
REMARK 200 IN THE HIGHEST RESOLUTION SHELL.                                     
REMARK 200  HIGHEST RESOLUTION SHELL, RANGE HIGH (A) : 2.03                     
REMARK 200  HIGHEST RESOLUTION SHELL, RANGE LOW  (A) : 2.10                     
REMARK 200  COMPLETENESS FOR SHELL     (%) : NULL                               
REMARK 200  DATA REDUNDANCY IN SHELL       : NULL                               
REMARK 200  R MERGE FOR SHELL          (I) : NULL                               
REMARK 200  R SYM FOR SHELL            (I) : NULL                               
REMARK 200  <I/SIGMA(I)> FOR SHELL         : NULL                               
REMARK 200                                                                      
REMARK 200 DIFFRACTION PROTOCOL: SINGLE WAVELENGTH                              
REMARK 200 METHOD USED TO DETERMINE THE STRUCTURE: NULL                         
REMARK 200 SOFTWARE USED: PHASER                                                
REMARK 200 STARTING MODEL: NULL                                                 
REMARK 200                                                                      
REMARK 200 REMARK: NULL                                                         
REMARK 280                                                                      
REMARK 280 CRYSTAL                                                              
REMARK 280 SOLVENT CONTENT, VS   (%): 38.70                                     
REMARK 280 MATTHEWS COEFFICIENT, VM (ANGSTROMS**3/DA): 2.01                     
REMARK 280                                                                      
REMARK 280 CRYSTALLIZATION CONDITIONS: 0.1 M SODIUM ACETATE PH 4.5 0.2 M        
REMARK 280  SODIUM CHLORIDE 28% 2-METHYL-2,4-PENTANEDIOL 0.1 M POTASSIUM        
REMARK 280  IODIDE, VAPOR DIFFUSION, HANGING DROP, TEMPERATURE 296.15K          
REMARK 290                                                                      
REMARK 290 CRYSTALLOGRAPHIC SYMMETRY                                            
REMARK 290 SYMMETRY OPERATORS FOR SPACE GROUP: I 41                             
REMARK 290                                                                      
REMARK 290      SYMOP   SYMMETRY                                                
REMARK 290     NNNMMM   OPERATOR                                                
REMARK 290       1555   X,Y,Z                                                   
REMARK 290       2555   -X+1/2,-Y+1/2,Z+1/2                                     
REMARK 290       3555   -Y,X+1/2,Z+1/4                                          
REMARK 290       4555   Y+1/2,-X,Z+3/4                                          
REMARK 290       5555   X+1/2,Y+1/2,Z+1/2                                       
REMARK 290       6555   -X,-Y,Z                                                 
REMARK 290       7555   -Y+1/2,X,Z+3/4                                          
REMARK 290       8555   Y,-X+1/2,Z+1/4                                          
REMARK 290                                                                      
REMARK 290     WHERE NNN -> OPERATOR NUMBER                                     
REMARK 290           MMM -> TRANSLATION VECTOR                                  
REMARK 290                                                                      
REMARK 290 CRYSTALLOGRAPHIC SYMMETRY TRANSFORMATIONS                            
REMARK 290 THE FOLLOWING TRANSFORMATIONS OPERATE ON THE ATOM/HETATM             
REMARK 290 RECORDS IN THIS ENTRY TO PRODUCE CRYSTALLOGRAPHICALLY                
REMARK 290 RELATED MOLECULES.                                                   
REMARK 290   SMTRY1   1  1.000000  0.000000  0.000000        0.00000            
REMARK 290   SMTRY2   1  0.000000  1.000000  0.000000        0.00000            
REMARK 290   SMTRY3   1  0.000000  0.000000  1.000000        0.00000            
REMARK 290   SMTRY1   2 -1.000000  0.000000  0.000000       19.65850            
REMARK 290   SMTRY2   2  0.000000 -1.000000  0.000000       19.65850            
REMARK 290   SMTRY3   2  0.000000  0.000000  1.000000       29.69200            
REMARK 290   SMTRY1   3  0.000000 -1.000000  0.000000        0.00000            
REMARK 290   SMTRY2   3  1.000000  0.000000  0.000000       19.65850            
REMARK 290   SMTRY3   3  0.000000  0.000000  1.000000       14.84600            
REMARK 290   SMTRY1   4  0.000000  1.000000  0.000000       19.65850            
REMARK 290   SMTRY2   4 -1.000000  0.000000  0.000000        0.00000            
REMARK 290   SMTRY3   4  0.000000  0.000000  1.000000       44.53800            
REMARK 290   SMTRY1   5  1.000000  0.000000  0.000000       19.65850            
REMARK 290   SMTRY2   5  0.000000  1.000000  0.000000       19.65850            
REMARK 290   SMTRY3   5  0.000000  0.000000  1.000000       29.69200            
REMARK 290   SMTRY1   6 -1.000000  0.000000  0.000000        0.00000            
REMARK 290   SMTRY2   6  0.000000 -1.000000  0.000000        0.00000            
REMARK 290   SMTRY3   6  0.000000  0.000000  1.000000        0.00000            
REMARK 290   SMTRY1   7  0.000000 -1.000000  0.000000       19.65850            
REMARK 290   SMTRY2   7  1.000000  0.000000  0.000000        0.00000            
REMARK 290   SMTRY3   7  0.000000  0.000000  1.000000       44.53800            
REMARK 290   SMTRY1   8  0.000000  1.000000  0.000000        0.00000            
REMARK 290   SMTRY2   8 -1.000000  0.000000  0.000000       19.65850            
REMARK 290   SMTRY3   8  0.000000  0.000000  1.000000       14.84600            
REMARK 290                                                                      
REMARK 290 REMARK: NULL                                                         
REMARK 300                                                                      
REMARK 300 BIOMOLECULE: 1                                                       
REMARK 300 SEE REMARK 350 FOR THE AUTHOR PROVIDED AND/OR PROGRAM                
REMARK 300 GENERATED ASSEMBLY INFORMATION FOR THE STRUCTURE IN                  
REMARK 300 THIS ENTRY. THE REMARK MAY ALSO PROVIDE INFORMATION ON               
REMARK 300 BURIED SURFACE AREA.                                                 
REMARK 350                                                                      
REMARK 350 COORDINATES FOR A COMPLETE MULTIMER REPRESENTING THE KNOWN           
REMARK 350 BIOLOGICALLY SIGNIFICANT OLIGOMERIZATION STATE OF THE                
REMARK 350 MOLECULE CAN BE GENERATED BY APPLYING BIOMT TRANSFORMATIONS          
REMARK 350 GIVEN BELOW.  BOTH NON-CRYSTALLOGRAPHIC AND                          
REMARK 350 CRYSTALLOGRAPHIC OPERATIONS ARE GIVEN.                               
REMARK 350                                                                      
REMARK 350 BIOMOLECULE: 1                                                       
REMARK 350 AUTHOR DETERMINED BIOLOGICAL UNIT: TRIMERIC                          
REMARK 350 SOFTWARE DETERMINED QUATERNARY STRUCTURE: TRIMERIC                   
REMARK 350 SOFTWARE USED: PISA                                                  
REMARK 350 TOTAL BURIED SURFACE AREA: 2170 ANGSTROM**2                          
REMARK 350 SURFACE AREA OF THE COMPLEX: 4170 ANGSTROM**2                        
REMARK 350 CHANGE IN SOLVENT FREE ENERGY: -23.0 KCAL/MOL                        
REMARK 350 APPLY THE FOLLOWING TO CHAINS: A, C, B                               
REMARK 350   BIOMT1   1  1.000000  0.000000  0.000000        0.00000            
REMARK 350   BIOMT2   1  0.000000  1.000000  0.000000        0.00000            
REMARK 350   BIOMT3   1  0.000000  0.000000  1.000000        0.00000            
REMARK 375                                                                      
REMARK 375 SPECIAL POSITION                                                     
REMARK 375 THE FOLLOWING ATOMS ARE FOUND TO BE WITHIN 0.15 ANGSTROMS            
REMARK 375 OF A SYMMETRY RELATED ATOM AND ARE ASSUMED TO BE ON SPECIAL          
REMARK 375 POSITIONS.                                                           
REMARK 375                                                                      
REMARK 375 ATOM RES CSSEQI                                                      
REMARK 375 I    IOD A 102  LIES ON A SPECIAL POSITION.                          
REMARK 500                                                                      
REMARK 500 GEOMETRY AND STEREOCHEMISTRY                                         
REMARK 500 SUBTOPIC: CLOSE CONTACTS IN SAME ASYMMETRIC UNIT                     
REMARK 500                                                                      
REMARK 500 THE FOLLOWING ATOMS ARE IN CLOSE CONTACT.                            
REMARK 500                                                                      
REMARK 500  ATM1  RES C  SSEQI   ATM2  RES C  SSEQI           DISTANCE          
REMARK 500   O    PHE B     4     H    LEU B    14              1.58            
REMARK 500                                                                      
REMARK 500 REMARK: NULL                                                         
REMARK 500                                                                      
REMARK 500 GEOMETRY AND STEREOCHEMISTRY                                         
REMARK 500 SUBTOPIC: CLOSE CONTACTS                                             
REMARK 500                                                                      
REMARK 500 THE FOLLOWING ATOMS THAT ARE RELATED BY CRYSTALLOGRAPHIC             
REMARK 500 SYMMETRY ARE IN CLOSE CONTACT.  AN ATOM LOCATED WITHIN 0.15          
REMARK 500 ANGSTROMS OF A SYMMETRY RELATED ATOM IS ASSUMED TO BE ON A           
REMARK 500 SPECIAL POSITION AND IS, THEREFORE, LISTED IN REMARK 375             
REMARK 500 INSTEAD OF REMARK 500.  ATOMS WITH NON-BLANK ALTERNATE               
REMARK 500 LOCATION INDICATORS ARE NOT INCLUDED IN THE CALCULATIONS.            
REMARK 500                                                                      
REMARK 500 DISTANCE CUTOFF:                                                     
REMARK 500 2.2 ANGSTROMS FOR CONTACTS NOT INVOLVING HYDROGEN ATOMS              
REMARK 500 1.6 ANGSTROMS FOR CONTACTS INVOLVING HYDROGEN ATOMS                  
REMARK 500                                                                      
REMARK 500  ATM1  RES C  SSEQI   ATM2  RES C  SSEQI  SSYMOP   DISTANCE          
REMARK 500   I    IOD B   105     O    HOH C   208     7554     2.15            
REMARK 500                                                                      
REMARK 500 REMARK: NULL                                                         
REMARK 500                                                                      
REMARK 500 GEOMETRY AND STEREOCHEMISTRY                                         
REMARK 500 SUBTOPIC: MAIN CHAIN PLANARITY                                       
REMARK 500                                                                      
REMARK 500 THE FOLLOWING RESIDUES HAVE A PSEUDO PLANARITY                       
REMARK 500 TORSION ANGLE, C(I) - CA(I) - N(I+1) - O(I), GREATER                 
REMARK 500 10.0 DEGREES. (M=MODEL NUMBER; RES=RESIDUE NAME;                     
REMARK 500 C=CHAIN IDENTIFIER; SSEQ=SEQUENCE NUMBER;                            
REMARK 500 I=INSERTION CODE).                                                   
REMARK 500                                                                      
REMARK 500  M RES CSSEQI        ANGLE                                           
REMARK 500    ORN B  15        -10.78                                           
REMARK 500                                                                      
REMARK 500 REMARK: NULL                                                         
REMARK 800                                                                      
REMARK 800 SITE                                                                 
REMARK 800 SITE_IDENTIFIER: AC1                                                 
REMARK 800 EVIDENCE_CODE: SOFTWARE                                              
REMARK 800 SITE_DESCRIPTION: binding site for residue IOD A 104                 
REMARK 800                                                                      
REMARK 800 SITE_IDENTIFIER: AC2                                                 
REMARK 800 EVIDENCE_CODE: SOFTWARE                                              
REMARK 800 SITE_DESCRIPTION: binding site for residue IOD B 101                 
REMARK 800                                                                      
REMARK 800 SITE_IDENTIFIER: AC3                                                 
REMARK 800 EVIDENCE_CODE: SOFTWARE                                              
REMARK 800 SITE_DESCRIPTION: binding site for residue IOD B 102                 
REMARK 800                                                                      
REMARK 800 SITE_IDENTIFIER: AC4                                                 
REMARK 800 EVIDENCE_CODE: SOFTWARE                                              
REMARK 800 SITE_DESCRIPTION: binding site for residue IOD B 103                 
REMARK 800                                                                      
REMARK 800 SITE_IDENTIFIER: AC5                                                 
REMARK 800 EVIDENCE_CODE: SOFTWARE                                              
REMARK 800 SITE_DESCRIPTION: binding site for residue IOD B 104                 
REMARK 800                                                                      
REMARK 800 SITE_IDENTIFIER: AC6                                                 
REMARK 800 EVIDENCE_CODE: SOFTWARE                                              
REMARK 800 SITE_DESCRIPTION: binding site for residue IOD B 105                 
REMARK 800                                                                      
REMARK 800 SITE_IDENTIFIER: AC7                                                 
REMARK 800 EVIDENCE_CODE: SOFTWARE                                              
REMARK 800 SITE_DESCRIPTION: binding site for residue MPD B 106                 
REMARK 800                                                                      
REMARK 800 SITE_IDENTIFIER: AC8                                                 
REMARK 800 EVIDENCE_CODE: SOFTWARE                                              
REMARK 800 SITE_DESCRIPTION: binding site for residue IOD C 101                 
REMARK 800                                                                      
REMARK 800 SITE_IDENTIFIER: AC9                                                 
REMARK 800 EVIDENCE_CODE: SOFTWARE                                              
REMARK 800 SITE_DESCRIPTION: binding site for residues IOD A 101 and IOD A      
REMARK 800  102                                                                 
REMARK 800                                                                      
REMARK 800 SITE_IDENTIFIER: AD1                                                 
REMARK 800 EVIDENCE_CODE: SOFTWARE                                              
REMARK 800 SITE_DESCRIPTION: binding site for residues IOD A 101 and IOD A      
REMARK 800  102                                                                 
REMARK 800                                                                      
REMARK 800 SITE_IDENTIFIER: AD2                                                 
REMARK 800 EVIDENCE_CODE: SOFTWARE                                              
REMARK 800 SITE_DESCRIPTION: binding site for Di-peptide ORN B 1 and VAL B 16   
REMARK 800                                                                      
REMARK 800 SITE_IDENTIFIER: AD3                                                 
REMARK 800 EVIDENCE_CODE: SOFTWARE                                              
REMARK 800 SITE_DESCRIPTION: binding site for Di-peptide ORN B 1 and CYS B 2    
REMARK 800                                                                      
REMARK 800 SITE_IDENTIFIER: AD4                                                 
REMARK 800 EVIDENCE_CODE: SOFTWARE                                              
REMARK 800 SITE_DESCRIPTION: binding site for Di-peptide ASP B 8 and ORN B 9    
REMARK 800                                                                      
REMARK 800 SITE_IDENTIFIER: AD5                                                 
REMARK 800 EVIDENCE_CODE: SOFTWARE                                              
REMARK 800 SITE_DESCRIPTION: binding site for Di-peptide ORN B 9 and ALA B 10   
REMARK 800                                                                      
REMARK 800 SITE_IDENTIFIER: AD6                                                 
REMARK 800 EVIDENCE_CODE: SOFTWARE                                              
REMARK 800 SITE_DESCRIPTION: binding site for Di-peptide ILE B 12 and EZY B     
REMARK 800  13                                                                  
REMARK 800                                                                      
REMARK 800 SITE_IDENTIFIER: AD7                                                 
REMARK 800 EVIDENCE_CODE: SOFTWARE                                              
REMARK 800 SITE_DESCRIPTION: binding site for Di-peptide EZY B 13 and LEU B     
REMARK 800  14                                                                  
REMARK 800                                                                      
REMARK 800 SITE_IDENTIFIER: AD8                                                 
REMARK 800 EVIDENCE_CODE: SOFTWARE                                              
REMARK 800 SITE_DESCRIPTION: binding site for Di-peptide LEU B 14 and ORN B     
REMARK 800  15                                                                  
REMARK 800                                                                      
REMARK 800 SITE_IDENTIFIER: AD9                                                 
REMARK 800 EVIDENCE_CODE: SOFTWARE                                              
REMARK 800 SITE_DESCRIPTION: binding site for Di-peptide ORN B 15 and VAL B     
REMARK 800  16                                                                  
REMARK 800                                                                      
REMARK 800 SITE_IDENTIFIER: AE1                                                 
REMARK 800 EVIDENCE_CODE: SOFTWARE                                              
REMARK 800 SITE_DESCRIPTION: binding site for Di-peptide ORN C 1 and CYS C 2    
REMARK 800                                                                      
REMARK 800 SITE_IDENTIFIER: AE2                                                 
REMARK 800 EVIDENCE_CODE: SOFTWARE                                              
REMARK 800 SITE_DESCRIPTION: binding site for Di-peptide ORN C 1 and VAL C 16   
REMARK 800                                                                      
REMARK 800 SITE_IDENTIFIER: AE3                                                 
REMARK 800 EVIDENCE_CODE: SOFTWARE                                              
REMARK 800 SITE_DESCRIPTION: binding site for Di-peptide ASP C 8 and ORN C 9    
REMARK 800                                                                      
REMARK 800 SITE_IDENTIFIER: AE4                                                 
REMARK 800 EVIDENCE_CODE: SOFTWARE                                              
REMARK 800 SITE_DESCRIPTION: binding site for Di-peptide ORN C 9 and ALA C 10   
REMARK 800                                                                      
REMARK 800 SITE_IDENTIFIER: AE5                                                 
REMARK 800 EVIDENCE_CODE: SOFTWARE                                              
REMARK 800 SITE_DESCRIPTION: binding site for Di-peptide ILE C 12 and EZY C     
REMARK 800  13                                                                  
REMARK 800                                                                      
REMARK 800 SITE_IDENTIFIER: AE6                                                 
REMARK 800 EVIDENCE_CODE: SOFTWARE                                              
REMARK 800 SITE_DESCRIPTION: binding site for Di-peptide EZY C 13 and LEU C     
REMARK 800  14                                                                  
REMARK 800                                                                      
REMARK 800 SITE_IDENTIFIER: AE7                                                 
REMARK 800 EVIDENCE_CODE: SOFTWARE                                              
REMARK 800 SITE_DESCRIPTION: binding site for Di-peptide LEU C 14 and ORN C     
REMARK 800  15                                                                  
REMARK 800                                                                      
REMARK 800 SITE_IDENTIFIER: AE8                                                 
REMARK 800 EVIDENCE_CODE: SOFTWARE                                              
REMARK 800 SITE_DESCRIPTION: binding site for Di-peptide ORN C 15 and VAL C     
REMARK 800  16                                                                  
DBREF  6CG4 A    1    16  PDB    6CG4     6CG4             1     16             
DBREF  6CG4 B    1    16  PDB    6CG4     6CG4             1     16             
DBREF  6CG4 C    1    16  PDB    6CG4     6CG4             1     16             
SEQRES   1 A   16  ORN CYS VAL PHE PHE CYS GLU ASP ORN ALA ILE ILE EZY          
SEQRES   2 A   16  LEU ORN VAL                                                  
SEQRES   1 B   16  ORN CYS VAL PHE PHE CYS GLU ASP ORN ALA ILE ILE EZY          
SEQRES   2 B   16  LEU ORN VAL                                                  
SEQRES   1 C   16  ORN CYS VAL PHE PHE CYS GLU ASP ORN ALA ILE ILE EZY          
SEQRES   2 C   16  LEU ORN VAL                                                  
HET    ORN  A   1      19                                                       
HET    ORN  A   9      19                                                       
HET    EZY  A  13      22                                                       
HET    ORN  A  15      19                                                       
HET    ORN  B   1      19                                                       
HET    ORN  B   9      19                                                       
HET    EZY  B  13      22                                                       
HET    ORN  B  15      19                                                       
HET    ORN  C   1      19                                                       
HET    ORN  C   9      19                                                       
HET    EZY  C  13      22                                                       
HET    ORN  C  15      19                                                       
HET    IOD  A 101       1                                                       
HET    IOD  A 102       1                                                       
HET    IOD  A 103       1                                                       
HET    IOD  A 104       1                                                       
HET    IOD  B 101       1                                                       
HET    IOD  B 102       1                                                       
HET    IOD  B 103       1                                                       
HET    IOD  B 104       1                                                       
HET    IOD  B 105       1                                                       
HET    MPD  B 106      22                                                       
HET    IOD  C 101       1                                                       
HETNAM     ORN L-ORNITHINE                                                      
HETNAM     EZY N-[(2-NITROPHENYL)METHYL]GLYCINE                                 
HETNAM     IOD IODIDE ION                                                       
HETNAM     MPD (4S)-2-METHYL-2,4-PENTANEDIOL                                    
HETSYN     EZY 2-NITROBENZYLGLYCINE                                             
FORMUL   1  ORN    9(C5 H12 N2 O2)                                              
FORMUL   1  EZY    3(C9 H10 N2 O4)                                              
FORMUL   4  IOD    10(I 1-)                                                     
FORMUL  13  MPD    C6 H14 O2                                                    
FORMUL  15  HOH   *21(H2 O)                                                     
SSBOND   1 CYS A    2    CYS C    6                          1555   1555  2.03  
SSBOND   2 CYS A    6    CYS B    2                          1555   1555  2.03  
SSBOND   3 CYS B    6    CYS C    2                          1555   1555  2.03  
LINK         NE  ORN A   1                 C   VAL A  16     1555   1555  1.38  
LINK         C   ORN A   1                 N   CYS A   2     1555   1555  1.37  
LINK         C   ASP A   8                 NE  ORN A   9     1555   1555  1.38  
LINK         C   ORN A   9                 N   ALA A  10     1555   1555  1.37  
LINK         C   ILE A  12                 N   EZY A  13     1555   1555  1.33  
LINK         C   EZY A  13                 N   LEU A  14     1555   1555  1.33  
LINK         C   LEU A  14                 N   ORN A  15     1555   1555  1.33  
LINK         C   ORN A  15                 N   VAL A  16     1555   1555  1.38  
LINK         NE  ORN B   1                 C   VAL B  16     1555   1555  1.38  
LINK         C   ORN B   1                 N   CYS B   2     1555   1555  1.37  
LINK         C   ASP B   8                 NE  ORN B   9     1555   1555  1.38  
LINK         C   ORN B   9                 N   ALA B  10     1555   1555  1.37  
LINK         C   ILE B  12                 N   EZY B  13     1555   1555  1.33  
LINK         C   EZY B  13                 N   LEU B  14     1555   1555  1.33  
LINK         C   LEU B  14                 N   ORN B  15     1555   1555  1.33  
LINK         C   ORN B  15                 N   VAL B  16     1555   1555  1.37  
LINK         NE  ORN C   1                 C   VAL C  16     1555   1555  1.38  
LINK         C   ORN C   1                 N   CYS C   2     1555   1555  1.37  
LINK         C   ASP C   8                 NE  ORN C   9     1555   1555  1.38  
LINK         C   ORN C   9                 N   ALA C  10     1555   1555  1.37  
LINK         C   ILE C  12                 N   EZY C  13     1555   1555  1.33  
LINK         C   EZY C  13                 N   LEU C  14     1555   1555  1.33  
LINK         C   LEU C  14                 N   ORN C  15     1555   1555  1.33  
LINK         C   ORN C  15                 N   VAL C  16     1555   1555  1.37  
LINK         I   IOD A 101                 I   IOD A 102     1555   1555  2.94  
LINK         I   IOD A 101                 I   IOD A 102     1555   6645  2.94  
SITE     1 AC1  4 ORN A   1  HOH A 206  ILE C  12  EZY C  13                    
SITE     1 AC2  1 ILE A  11                                                     
SITE     1 AC3  2 EZY C  13  HOH C 201                                          
SITE     1 AC4  1 ILE B  12                                                     
SITE     1 AC5  3 HOH A 205  GLU B   7  ORN B   9                               
SITE     1 AC6  4 ORN B   9  ORN C   9  IOD C 101  HOH C 208                    
SITE     1 AC7  4 CYS A   6  LEU A  14  EZY B  13  HOH B 203                    
SITE     1 AC8  2 ORN B   9  IOD B 105                                          
SITE     1 AC9  2 ORN A   1  ORN A  15                                          
SITE     1 AD1  2 ORN A   1  ORN A  15                                          
SITE     1 AD2 10 CYS A   6  GLU A   7  CYS B   2  PHE B   4                    
SITE     2 AD2 10 EZY B  13  LEU B  14  ORN B  15  HOH B 203                    
SITE     3 AD2 10 HOH B 204  ORN C   1                                          
SITE     1 AD3 10 PHE A   5  CYS A   6  GLU A   7  VAL B   3                    
SITE     2 AD3 10 EZY B  13  LEU B  14  VAL B  16  HOH B 203                    
SITE     3 AD3 10 HOH B 204  ORN C   1                                          
SITE     1 AD4  6 GLU B   7  ALA B  10  IOD B 104  IOD B 105                    
SITE     2 AD4  6 ORN C  15  IOD C 101                                          
SITE     1 AD5  7 GLU B   7  ASP B   8  ILE B  11  IOD B 104                    
SITE     2 AD5  7 IOD B 105  ORN C  15  IOD C 101                               
SITE     1 AD6  8 ORN B   1  PHE B   4  PHE B   5  CYS B   6                    
SITE     2 AD6  8 ILE B  11  LEU B  14  IOD B 103  MPD B 106                    
SITE     1 AD7  9 ORN B   1  CYS B   2  VAL B   3  PHE B   4                    
SITE     2 AD7  9 ILE B  11  ILE B  12  ORN B  15  VAL B  16                    
SITE     3 AD7  9 MPD B 106                                                     
SITE     1 AD8  8 CYS B   2  VAL B   3  PHE B   4  ILE B  12                    
SITE     2 AD8  8 EZY B  13  VAL B  16  HOH B 202  ORN C   1                    
SITE     1 AD9  6 ORN B   1  CYS B   2  PHE B   4  LEU B  14                    
SITE     2 AD9  6 HOH B 202  ORN C   1                                          
SITE     1 AE1 12 ORN B   1  PHE B   5  CYS B   6  GLU B   7                    
SITE     2 AE1 12 ILE B  11  ORN B  15  HOH B 202  VAL C   3                    
SITE     3 AE1 12 PHE C   4  LEU C  14  ORN C  15  VAL C  16                    
SITE     1 AE2 10 ORN B   1  CYS B   6  GLU B   7  ILE B  11                    
SITE     2 AE2 10 ORN B  15  HOH B 202  CYS C   2  PHE C   4                    
SITE     3 AE2 10 LEU C  14  ORN C  15                                          
SITE     1 AE3 11 GLU A   7  ORN A   9  ORN A  15  IOD B 105                    
SITE     2 AE3 11 CYS C   6  GLU C   7  ALA C  10  ILE C  11                    
SITE     3 AE3 11 ORN C  15  HOH C 204  HOH C 206                               
SITE     1 AE4 10 GLU A   7  ORN A   9  ILE A  12  EZY A  13                    
SITE     2 AE4 10 ORN A  15  IOD B 105  GLU C   7  ASP C   8                    
SITE     3 AE4 10 ILE C  11  HOH C 204                                          
SITE     1 AE5 10 ORN A   1  EZY A  13  IOD A 104  IOD B 102                    
SITE     2 AE5 10 PHE C   4  PHE C   5  CYS C   6  ILE C  11                    
SITE     3 AE5 10 LEU C  14  HOH C 201                                          
SITE     1 AE6 13 ORN A   1  EZY A  13  IOD A 104  IOD B 102                    
SITE     2 AE6 13 CYS C   2  VAL C   3  PHE C   4  PHE C   5                    
SITE     3 AE6 13 ILE C  11  ILE C  12  ORN C  15  VAL C  16                    
SITE     4 AE6 13 HOH C 201                                                     
SITE     1 AE7 11 ORN B   9  ALA B  10  ILE B  11  ORN C   1                    
SITE     2 AE7 11 CYS C   2  VAL C   3  PHE C   4  ASP C   8                    
SITE     3 AE7 11 ILE C  12  EZY C  13  VAL C  16                               
SITE     1 AE8  8 ORN B   9  ALA B  10  ILE B  11  ORN C   1                    
SITE     2 AE8  8 CYS C   2  PHE C   4  ASP C   8  LEU C  14                    
CRYST1   39.317   39.317   59.384  90.00  90.00  90.00 I 41         24          
ORIGX1      1.000000  0.000000  0.000000        0.00000                         
ORIGX2      0.000000  1.000000  0.000000        0.00000                         
ORIGX3      0.000000  0.000000  1.000000        0.00000                         
SCALE1      0.025434  0.000000  0.000000        0.00000                         
SCALE2      0.000000  0.025434  0.000000        0.00000                         
SCALE3      0.000000  0.000000  0.016840        0.00000                         
HETATM    1  N   ORN A   1      16.418 -13.671  -9.501  1.00 13.80           N  
ANISOU    1  N   ORN A   1     1810   1909   1524   -416    362   -632       N  
HETATM    2  CA  ORN A   1      17.345 -12.867 -10.358  1.00 17.19           C  
ANISOU    2  CA  ORN A   1     2251   2343   1938   -380    333   -613       C  
HETATM    3  CB  ORN A   1      18.788 -12.985  -9.853  1.00 12.98           C  
ANISOU    3  CB  ORN A   1     1746   1815   1370   -383    340   -573       C  
HETATM    4  CG  ORN A   1      19.094 -12.004  -8.709  1.00  9.67           C  
ANISOU    4  CG  ORN A   1     1319   1406    950   -404    348   -565       C  
HETATM    5  CD  ORN A   1      19.656 -10.672  -9.224  1.00  9.21           C  
ANISOU    5  CD  ORN A   1     1256   1357    885   -380    323   -557       C  
HETATM    6  NE  ORN A   1      20.902 -10.874  -9.940  1.00  9.97           N  
ANISOU    6  NE  ORN A   1     1379   1457    953   -355    312   -525       N  
HETATM    7  C   ORN A   1      17.247 -13.262 -11.857  1.00 13.77           C  
ANISOU    7  C   ORN A   1     1828   1902   1504   -345    310   -618       C  
HETATM    8  O   ORN A   1      16.450 -14.115 -12.252  1.00 12.48           O  
ANISOU    8  O   ORN A   1     1661   1728   1354   -347    312   -637       O  
HETATM    9  H1  ORN A   1      15.487 -13.787  -9.910  1.00 16.67           H  
HETATM   10  H2  ORN A   1      16.755 -14.619  -9.321  1.00 16.67           H  
HETATM   11  H3  ORN A   1      16.261 -13.258  -8.578  1.00 16.67           H  
HETATM   12  HA  ORN A   1      16.979 -11.839 -10.285  1.00 20.75           H  
HETATM   13  HB2 ORN A   1      18.989 -14.010  -9.512  1.00 15.69           H  
HETATM   14  HB3 ORN A   1      19.454 -12.721 -10.686  1.00 15.69           H  
HETATM   15  HG2 ORN A   1      18.171 -11.812  -8.149  1.00 11.72           H  
HETATM   16  HG3 ORN A   1      19.830 -12.460  -8.037  1.00 11.72           H  
HETATM   17  HD2 ORN A   1      19.850 -10.020  -8.367  1.00 10.54           H  
HETATM   18  HD3 ORN A   1      18.925 -10.216  -9.899  1.00 10.54           H  
HETATM   19  HE1 ORN A   1      21.714 -11.083  -9.363  1.00 12.08           H  
ATOM     20  N   CYS A   2      18.088 -12.582 -12.704  1.00 12.61           N  
ANISOU   20  N   CYS A   2     1693   1759   1339   -314    286   -600       N  
ATOM     21  CA  CYS A   2      18.087 -12.813 -14.142  1.00 11.29           C  
ANISOU   21  CA  CYS A   2     1539   1584   1168   -280    262   -603       C  
ATOM     22  C   CYS A   2      19.417 -13.309 -14.691  1.00 12.47           C  
ANISOU   22  C   CYS A   2     1721   1737   1281   -258    260   -570       C  
ATOM     23  O   CYS A   2      20.452 -13.225 -14.032  1.00  9.44           O  
ANISOU   23  O   CYS A   2     1348   1363    876   -266    273   -541       O  
ATOM     24  CB  CYS A   2      17.702 -11.518 -14.856  1.00 12.16           C  
ANISOU   24  CB  CYS A   2     1634   1695   1291   -260    232   -618       C  
ATOM     25  SG  CYS A   2      16.317 -10.655 -14.085  1.00 13.75           S  
ANISOU   25  SG  CYS A   2     1794   1897   1534   -281    234   -653       S  
ATOM     26  H   CYS A   2      18.638 -11.972 -12.450  1.00 15.25           H  
ATOM     27  HA  CYS A   2      17.413 -13.479 -14.351  1.00 13.67           H  
ATOM     28  HB2 CYS A   2      18.465 -10.919 -14.851  1.00 14.71           H  
ATOM     29  HB3 CYS A   2      17.452 -11.726 -15.769  1.00 14.71           H  
ATOM     30  N   VAL A   3      19.368 -13.828 -15.914  1.00 13.90           N  
ANISOU   30  N   VAL A   3     1916   1910   1456   -231    245   -574       N  
ATOM     31  CA  VAL A   3      20.550 -14.275 -16.639  1.00 15.53           C  
ANISOU   31  CA  VAL A   3     2152   2121   1629   -205    242   -545       C  
ATOM     32  C   VAL A   3      20.969 -13.147 -17.572  1.00 13.16           C  
ANISOU   32  C   VAL A   3     1855   1828   1318   -179    217   -540       C  
ATOM     33  O   VAL A   3      20.287 -12.865 -18.562  1.00 14.64           O  
ANISOU   33  O   VAL A   3     2041   2006   1517   -161    194   -560       O  
ATOM     34  CB  VAL A   3      20.278 -15.567 -17.423  1.00 12.01           C  
ANISOU   34  CB  VAL A   3     1724   1661   1180   -190    241   -553       C  
ATOM     35  CG1 VAL A   3      21.514 -15.988 -18.213  1.00  9.24           C  
ANISOU   35  CG1 VAL A   3     1401   1316    793   -159    239   -525       C  
ATOM     36  CG2 VAL A   3      19.833 -16.678 -16.485  1.00 15.22           C  
ANISOU   36  CG2 VAL A   3     2129   2059   1596   -219    265   -560       C  
ATOM     37  H   VAL A   3      18.638 -13.934 -16.356  1.00 16.80           H  
ATOM     38  HA  VAL A   3      21.272 -14.441 -16.013  1.00 18.75           H  
ATOM     39  HB  VAL A   3      19.561 -15.405 -18.055  1.00 14.53           H  
ATOM     40 HG11 VAL A   3      21.315 -16.805 -18.698  1.00 11.12           H  
ATOM     41 HG12 VAL A   3      21.747 -15.282 -18.836  1.00 11.12           H  
ATOM     42 HG13 VAL A   3      22.247 -16.140 -17.596  1.00 11.12           H  
ATOM     43 HG21 VAL A   3      19.668 -17.481 -17.004  1.00 18.38           H  
ATOM     44 HG22 VAL A   3      20.534 -16.841 -15.835  1.00 18.38           H  
ATOM     45 HG23 VAL A   3      19.020 -16.402 -16.033  1.00 18.38           H  
ATOM     46  N   PHE A   4      22.082 -12.493 -17.257  1.00  8.94           N  
ANISOU   46  N   PHE A   4     1325   1310    762   -178    221   -511       N  
ATOM     47  CA  PHE A   4      22.703 -11.529 -18.153  1.00 10.73           C  
ANISOU   47  CA  PHE A   4     1560   1546    970   -155    202   -499       C  
ATOM     48  C   PHE A   4      23.800 -12.217 -18.957  1.00 12.10           C  
ANISOU   48  C   PHE A   4     1759   1727   1110   -128    206   -471       C  
ATOM     49  O   PHE A   4      24.487 -13.114 -18.461  1.00 14.71           O  
ANISOU   49  O   PHE A   4     2099   2062   1427   -131    226   -450       O  
ATOM     50  CB  PHE A   4      23.304 -10.349 -17.381  1.00 10.85           C  
ANISOU   50  CB  PHE A   4     1565   1577    981   -170    203   -484       C  
ATOM     51  CG  PHE A   4      22.288  -9.374 -16.836  1.00 11.58           C  
ANISOU   51  CG  PHE A   4     1633   1664   1103   -188    193   -512       C  
ATOM     52  CD1 PHE A   4      20.951  -9.715 -16.718  1.00  9.58           C  
ANISOU   52  CD1 PHE A   4     1363   1395    883   -196    191   -545       C  
ATOM     53  CD2 PHE A   4      22.684  -8.102 -16.449  1.00 10.33           C  
ANISOU   53  CD2 PHE A   4     1467   1516    941   -195    184   -504       C  
ATOM     54  CE1 PHE A   4      20.033  -8.812 -16.217  1.00 11.97           C  
ANISOU   54  CE1 PHE A   4     1640   1694   1214   -210    183   -570       C  
ATOM     55  CE2 PHE A   4      21.771  -7.196 -15.950  1.00 12.05           C  
ANISOU   55  CE2 PHE A   4     1662   1728   1187   -209    174   -530       C  
ATOM     56  CZ  PHE A   4      20.443  -7.551 -15.833  1.00 12.59           C  
ANISOU   56  CZ  PHE A   4     1712   1782   1289   -215    174   -562       C  
ATOM     57  H   PHE A   4      22.504 -12.595 -16.515  1.00 10.47           H  
ATOM     58  HA  PHE A   4      22.038 -11.186 -18.770  1.00 12.99           H  
ATOM     59  HB2 PHE A   4      23.811 -10.695 -16.630  1.00 13.14           H  
ATOM     60  HB3 PHE A   4      23.893  -9.858 -17.975  1.00 13.14           H  
ATOM     61  HD1 PHE A   4      20.669 -10.564 -16.974  1.00 11.61           H  
ATOM     62  HD2 PHE A   4      23.578  -7.858 -16.523  1.00 12.50           H  
ATOM     63  HE1 PHE A   4      19.138  -9.053 -16.141  1.00 14.48           H  
ATOM     64  HE2 PHE A   4      22.050  -6.348 -15.692  1.00 14.57           H  
ATOM     65  HZ  PHE A   4      19.826  -6.942 -15.498  1.00 15.22           H  
ATOM     66  N   PHE A   5      23.961 -11.788 -20.204  1.00 13.13           N  
ANISOU   66  N   PHE A   5     1903   1860   1227   -102    186   -472       N  
ATOM     67  CA  PHE A   5      25.019 -12.291 -21.075  1.00 15.60           C  
ANISOU   67  CA  PHE A   5     2238   2182   1506    -74    190   -445       C  
ATOM     68  C   PHE A   5      26.166 -11.289 -21.034  1.00 15.77           C  
ANISOU   68  C   PHE A   5     2261   2227   1504    -72    190   -413       C  
ATOM     69  O   PHE A   5      26.071 -10.203 -21.615  1.00 10.90           O  
ANISOU   69  O   PHE A   5     1644   1614    883    -68    170   -418       O  
ATOM     70  CB  PHE A   5      24.500 -12.498 -22.497  1.00 17.17           C  
ANISOU   70  CB  PHE A   5     2455   2369   1701    -48    169   -464       C  
ATOM     71  CG  PHE A   5      23.245 -13.321 -22.565  1.00 22.72           C  
ANISOU   71  CG  PHE A   5     3154   3047   2431    -52    164   -497       C  
ATOM     72  CD1 PHE A   5      23.300 -14.703 -22.479  1.00 24.89           C  
ANISOU   72  CD1 PHE A   5     3440   3316   2703    -47    179   -495       C  
ATOM     73  CD2 PHE A   5      22.009 -12.713 -22.707  1.00 28.18           C  
ANISOU   73  CD2 PHE A   5     3832   3723   3153    -61    142   -529       C  
ATOM     74  CE1 PHE A   5      22.146 -15.462 -22.537  1.00 26.53           C  
ANISOU   74  CE1 PHE A   5     3644   3502   2935    -54    174   -525       C  
ATOM     75  CE2 PHE A   5      20.851 -13.466 -22.766  1.00 29.47           C  
ANISOU   75  CE2 PHE A   5     3989   3865   3342    -66    137   -558       C  
ATOM     76  CZ  PHE A   5      20.920 -14.843 -22.681  1.00 28.09           C  
ANISOU   76  CZ  PHE A   5     3826   3685   3163    -64    154   -555       C  
ATOM     77  H   PHE A   5      23.461 -11.195 -20.576  1.00 15.87           H  
ATOM     78  HA  PHE A   5      25.340 -13.142 -20.738  1.00 18.83           H  
ATOM     79  HB2 PHE A   5      24.309 -11.632 -22.890  1.00 20.72           H  
ATOM     80  HB3 PHE A   5      25.182 -12.952 -23.016  1.00 20.72           H  
ATOM     81  HD1 PHE A   5      24.123 -15.125 -22.382  1.00 29.99           H  
ATOM     82  HD2 PHE A   5      21.958 -11.786 -22.765  1.00 33.93           H  
ATOM     83  HE1 PHE A   5      22.195 -16.389 -22.480  1.00 31.95           H  
ATOM     84  HE2 PHE A   5      20.027 -13.046 -22.863  1.00 35.48           H  
ATOM     85  HZ  PHE A   5      20.143 -15.352 -22.721  1.00 33.83           H  
ATOM     86  N   CYS A   6      27.245 -11.649 -20.339  1.00  8.66           N  
ANISOU   86  N   CYS A   6     1360   1341    588    -77    211   -379       N  
ATOM     87  CA  CYS A   6      28.321 -10.713 -20.057  1.00 10.06           C  
ANISOU   87  CA  CYS A   6     1535   1541    749    -81    213   -346       C  
ATOM     88  C   CYS A   6      29.671 -11.371 -20.286  1.00  9.15           C  
ANISOU   88  C   CYS A   6     1430   1441    606    -60    229   -305       C  
ATOM     89  O   CYS A   6      29.850 -12.570 -20.055  1.00  8.61           O  
ANISOU   89  O   CYS A   6     1367   1367    537    -53    243   -301       O  
ATOM     90  CB  CYS A   6      28.261 -10.195 -18.616  1.00  8.76           C  
ANISOU   90  CB  CYS A   6     1352   1378    600   -114    220   -344       C  
ATOM     91  SG  CYS A   6      26.682  -9.477 -18.137  1.00 10.81           S  
ANISOU   91  SG  CYS A   6     1593   1620    895   -138    206   -391       S  
ATOM     92  H   CYS A   6      27.374 -12.437 -20.018  1.00  9.82           H  
ATOM     93  HA  CYS A   6      28.248  -9.953 -20.656  1.00 12.19           H  
ATOM     94  HB2 CYS A   6      28.441 -10.934 -18.014  1.00 10.63           H  
ATOM     95  HB3 CYS A   6      28.939  -9.511 -18.505  1.00 10.63           H  
ATOM     96  N   GLU A   7      30.623 -10.556 -20.734  1.00  9.53           N  
ANISOU   96  N   GLU A   7     1479   1508    633    -51    225   -276       N  
ATOM     97  CA  GLU A   7      32.003 -10.998 -20.863  1.00 14.99           C  
ANISOU   97  CA  GLU A   7     2175   2217   1304    -33    240   -234       C  
ATOM     98  C   GLU A   7      32.559 -11.367 -19.494  1.00 16.40           C  
ANISOU   98  C   GLU A   7     2343   2398   1490    -50    255   -214       C  
ATOM     99  O   GLU A   7      32.461 -10.590 -18.539  1.00 15.69           O  
ANISOU   99  O   GLU A   7     2240   2309   1411    -78    251   -213       O  
ATOM    100  CB  GLU A   7      32.844  -9.891 -21.503  1.00 15.21           C  
ANISOU  100  CB  GLU A   7     2204   2263   1313    -27    232   -206       C  
ATOM    101  CG  GLU A   7      34.324 -10.211 -21.650  1.00 16.67           C  
ANISOU  101  CG  GLU A   7     2390   2463   1479     -8    248   -161       C  
ATOM    102  CD  GLU A   7      34.586 -11.321 -22.643  1.00 15.71           C  
ANISOU  102  CD  GLU A   7     2287   2340   1343     26    259   -159       C  
ATOM    103  OE1 GLU A   7      33.787 -11.473 -23.592  1.00 16.34           O  
ANISOU  103  OE1 GLU A   7     2380   2411   1419     38    248   -186       O  
ATOM    104  OE2 GLU A   7      35.591 -12.043 -22.476  1.00 15.56           O1-
ANISOU  104  OE2 GLU A   7     2269   2324   1317     39    277   -132       O1-
ATOM    105  H   GLU A   7      30.493  -9.740 -20.970  1.00 11.55           H  
ATOM    106  HA  GLU A   7      32.041 -11.782 -21.433  1.00 18.11           H  
ATOM    107  HB2 GLU A   7      32.494  -9.710 -22.389  1.00 18.37           H  
ATOM    108  HB3 GLU A   7      32.771  -9.093 -20.955  1.00 18.37           H  
ATOM    109  HG2 GLU A   7      34.790  -9.418 -21.958  1.00 20.11           H  
ATOM    110  HG3 GLU A   7      34.675 -10.490 -20.790  1.00 20.11           H  
ATOM    111  N   ASP A   8      33.139 -12.557 -19.399  1.00 15.66           N  
ANISOU  111  N   ASP A   8     2255   2305   1389    -34    270   -199       N  
ATOM    112  CA  ASP A   8      33.717 -13.026 -18.146  1.00 18.94           C  
ANISOU  112  CA  ASP A   8     2664   2722   1809    -48    282   -180       C  
ATOM    113  C   ASP A   8      34.851 -14.009 -18.418  1.00 18.03           C  
ANISOU  113  C   ASP A   8     2555   2619   1677    -20    296   -151       C  
ATOM    114  O   ASP A   8      34.637 -15.065 -19.012  1.00 16.71           O  
ANISOU  114  O   ASP A   8     2398   2449   1504      0    300   -164       O  
ATOM    115  CB  ASP A   8      32.643 -13.686 -17.279  1.00 25.02           C  
ANISOU  115  CB  ASP A   8     3435   3472   2599    -72    286   -210       C  
ATOM    116  CG  ASP A   8      33.134 -14.005 -15.881  1.00 31.56           C  
ANISOU  116  CG  ASP A   8     4260   4299   3431    -93    296   -192       C  
ATOM    117  OD1 ASP A   8      34.218 -13.515 -15.499  1.00 32.93           O  
ANISOU  117  OD1 ASP A   8     4428   4489   3597    -92    297   -158       O  
ATOM    118  OD2 ASP A   8      32.432 -14.749 -15.162  1.00 33.11           O1-
ANISOU  118  OD2 ASP A   8     4461   4479   3640   -111    303   -212       O1-
ATOM    119  H   ASP A   8      33.212 -13.116 -20.049  1.00 18.90           H  
ATOM    120  HA  ASP A   8      34.080 -12.270 -17.659  1.00 22.84           H  
ATOM    121  HB2 ASP A   8      31.886 -13.084 -17.202  1.00 30.14           H  
ATOM    122  HB3 ASP A   8      32.366 -14.516 -17.697  1.00 30.14           H  
HETATM  123  N   ORN A   9      38.596 -15.955 -21.832  1.00 27.05           N  
ANISOU  123  N   ORN A   9     3707   3803   2767      6    334    -99       N  
HETATM  124  CA  ORN A   9      37.237 -15.569 -21.366  1.00 23.67           C  
ANISOU  124  CA  ORN A   9     3252   3393   2347     61    305   -109       C  
HETATM  125  CB  ORN A   9      37.262 -14.170 -20.731  1.00 25.49           C  
ANISOU  125  CB  ORN A   9     3515   3586   2584     48    310    -90       C  
HETATM  126  CG  ORN A   9      38.073 -14.098 -19.424  1.00 24.28           C  
ANISOU  126  CG  ORN A   9     3353   3439   2434     32    318    -63       C  
HETATM  127  CD  ORN A   9      37.262 -14.498 -18.172  1.00 24.21           C  
ANISOU  127  CD  ORN A   9     3335   3429   2436      9    315    -83       C  
HETATM  128  NE  ORN A   9      36.102 -13.640 -17.975  1.00 23.84           N  
ANISOU  128  NE  ORN A   9     3283   3370   2404    -18    301   -112       N  
HETATM  129  C   ORN A   9      36.223 -15.599 -22.534  1.00 21.24           C  
ANISOU  129  C   ORN A   9     2947   3084   2038     47    295   -151       C  
HETATM  130  O   ORN A   9      36.570 -15.830 -23.695  1.00 16.72           O  
ANISOU  130  O   ORN A   9     2403   2492   1456     24    311   -158       O  
HETATM  131  H2  ORN A   9      39.232 -16.195 -21.067  1.00 32.57           H  
HETATM  132  H   ORN A   9      39.070 -15.215 -22.355  1.00 32.57           H  
HETATM  133  H3  ORN A   9      38.596 -16.770 -22.450  1.00 32.57           H  
HETATM  134  HA  ORN A   9      36.939 -16.344 -20.654  1.00 28.51           H  
HETATM  135  HB2 ORN A   9      37.680 -13.444 -21.442  1.00 30.70           H  
HETATM  136  HB3 ORN A   9      36.226 -13.902 -20.479  1.00 30.70           H  
HETATM  137  HG2 ORN A   9      38.940 -14.763 -19.513  1.00 29.25           H  
HETATM  138  HG3 ORN A   9      38.431 -13.070 -19.292  1.00 29.25           H  
HETATM  139  HD2 ORN A   9      37.911 -14.403 -17.296  1.00 29.17           H  
HETATM  140  HD3 ORN A   9      36.923 -15.531 -18.289  1.00 29.17           H  
HETATM  141  HE1 ORN A   9      36.275 -12.765 -17.484  1.00 28.72           H  
ATOM    142  N   ALA A  10      34.918 -15.355 -22.187  1.00 14.88           N  
ANISOU  142  N   ALA A  10     2173   2240   1241     63    290   -171       N  
ATOM    143  CA  ALA A  10      33.855 -15.357 -23.181  1.00 14.33           C  
ANISOU  143  CA  ALA A  10     2113   2161   1173     69    276   -207       C  
ATOM    144  C   ALA A  10      32.590 -14.712 -22.632  1.00 10.71           C  
ANISOU  144  C   ALA A  10     1664   1674    731     46    266   -236       C  
ATOM    145  O   ALA A  10      32.477 -14.455 -21.433  1.00  9.64           O  
ANISOU  145  O   ALA A  10     1519   1531    611     19    270   -233       O  
ATOM    146  CB  ALA A  10      33.563 -16.779 -23.636  1.00 13.55           C  
ANISOU  146  CB  ALA A  10     2012   2062   1074     70    281   -233       C  
ATOM    147  H   ALA A  10      34.650 -15.194 -21.386  1.00 17.97           H  
ATOM    148  HA  ALA A  10      34.143 -14.846 -23.953  1.00 17.32           H  
ATOM    149  HB1 ALA A  10      32.853 -16.759 -24.296  1.00 16.38           H  
ATOM    150  HB2 ALA A  10      34.368 -17.157 -24.025  1.00 16.38           H  
ATOM    151  HB3 ALA A  10      33.287 -17.305 -22.869  1.00 16.38           H  
ATOM    152  N   ILE A  11      31.649 -14.437 -23.529  1.00  8.99           N  
ANISOU  152  N   ILE A  11     1456   1444    516     52    250   -266       N  
ATOM    153  CA  ILE A  11      30.317 -13.990 -23.139  1.00 13.03           C  
ANISOU  153  CA  ILE A  11     1966   1931   1053     27    237   -301       C  
ATOM    154  C   ILE A  11      29.552 -15.205 -22.633  1.00 13.80           C  
ANISOU  154  C   ILE A  11     2064   2009   1168     19    243   -325       C  
ATOM    155  O   ILE A  11      29.324 -16.159 -23.382  1.00 14.33           O  
ANISOU  155  O   ILE A  11     2144   2070   1231     40    241   -339       O  
ATOM    156  CB  ILE A  11      29.588 -13.327 -24.316  1.00  9.00           C  
ANISOU  156  CB  ILE A  11     1467   1413    540     37    214   -325       C  
ATOM    157  CG1 ILE A  11      30.357 -12.089 -24.790  1.00 11.65           C  
ANISOU  157  CG1 ILE A  11     1804   1766    855     40    208   -299       C  
ATOM    158  CG2 ILE A  11      28.158 -12.957 -23.924  1.00 11.10           C  
ANISOU  158  CG2 ILE A  11     1725   1655    836     13    198   -365       C  
ATOM    159  CD1 ILE A  11      29.828 -11.487 -26.071  1.00 13.04           C  
ANISOU  159  CD1 ILE A  11     1998   1935   1020     53    185   -317       C  
ATOM    160  H   ILE A  11      31.759 -14.501 -24.379  1.00 10.91           H  
ATOM    161  HA  ILE A  11      30.388 -13.346 -22.416  1.00 15.75           H  
ATOM    162  HB  ILE A  11      29.549 -13.961 -25.049  1.00 10.91           H  
ATOM    163 HG12 ILE A  11      30.308 -11.409 -24.100  1.00 14.09           H  
ATOM    164 HG13 ILE A  11      31.283 -12.337 -24.940  1.00 14.09           H  
ATOM    165 HG21 ILE A  11      27.720 -12.540 -24.683  1.00 13.43           H  
ATOM    166 HG22 ILE A  11      27.682 -13.762 -23.668  1.00 13.43           H  
ATOM    167 HG23 ILE A  11      28.186 -12.338 -23.178  1.00 13.43           H  
ATOM    168 HD11 ILE A  11      30.366 -10.713 -26.301  1.00 15.76           H  
ATOM    169 HD12 ILE A  11      29.882 -12.150 -26.777  1.00 15.76           H  
ATOM    170 HD13 ILE A  11      28.905 -11.221 -25.936  1.00 15.76           H  
ATOM    171  N   ILE A  12      29.152 -15.173 -21.367  1.00  9.24           N  
ANISOU  171  N   ILE A  12     1476   1423    613    -12    250   -331       N  
ATOM    172  CA  ILE A  12      28.450 -16.301 -20.768  1.00 12.85           C  
ANISOU  172  CA  ILE A  12     1935   1861   1086    -25    258   -351       C  
ATOM    173  C   ILE A  12      27.190 -15.832 -20.048  1.00 11.89           C  
ANISOU  173  C   ILE A  12     1800   1723    996    -58    252   -382       C  
ATOM    174  O   ILE A  12      27.027 -14.635 -19.801  1.00 10.57           O  
ANISOU  174  O   ILE A  12     1618   1561    835    -72    243   -384       O  
ATOM    175  CB  ILE A  12      29.371 -17.084 -19.798  1.00 14.85           C  
ANISOU  175  CB  ILE A  12     2190   2122   1331    -31    278   -323       C  
ATOM    176  CG1 ILE A  12      30.238 -16.141 -18.949  1.00 18.42           C  
ANISOU  176  CG1 ILE A  12     2629   2591   1779    -46    283   -292       C  
ATOM    177  CG2 ILE A  12      30.254 -18.053 -20.568  1.00 18.56           C  
ANISOU  177  CG2 ILE A  12     2672   2602   1777      2    284   -306       C  
ATOM    178  CD1 ILE A  12      29.489 -15.377 -17.877  1.00 19.46           C  
ANISOU  178  CD1 ILE A  12     2746   2715   1933    -83    281   -307       C  
ATOM    179  H   ILE A  12      29.275 -14.510 -20.833  1.00 11.21           H  
ATOM    180  HA  ILE A  12      28.178 -16.908 -21.474  1.00 15.53           H  
ATOM    181  HB  ILE A  12      28.809 -17.599 -19.198  1.00 17.94           H  
ATOM    182 HG12 ILE A  12      30.925 -16.665 -18.509  1.00 22.22           H  
ATOM    183 HG13 ILE A  12      30.652 -15.490 -19.537  1.00 22.22           H  
ATOM    184 HG21 ILE A  12      30.820 -18.530 -19.941  1.00 22.39           H  
ATOM    185 HG22 ILE A  12      29.690 -18.679 -21.049  1.00 22.39           H  
ATOM    186 HG23 ILE A  12      30.801 -17.552 -21.193  1.00 22.39           H  
ATOM    187 HD11 ILE A  12      30.114 -14.812 -17.397  1.00 23.47           H  
ATOM    188 HD12 ILE A  12      28.805 -14.832 -18.297  1.00 23.47           H  
ATOM    189 HD13 ILE A  12      29.079 -16.010 -17.267  1.00 23.47           H  
HETATM  190  N   EZY A  13      26.290 -16.760 -19.721  1.00 19.40           N  
ANISOU  190  N   EZY A  13     2752   2654   1964    -71    256   -406       N  
HETATM  191  CA  EZY A  13      25.217 -16.422 -18.789  1.00 18.47           C  
ANISOU  191  CA  EZY A  13     2616   2524   1876   -106    257   -430       C  
HETATM  192  C   EZY A  13      25.651 -16.136 -17.576  1.00 18.78           C  
ANISOU  192  C   EZY A  13     2646   2572   1916   -130    270   -413       C  
HETATM  193  O   EZY A  13      26.420 -16.860 -17.035  1.00 12.27           O  
ANISOU  193  O   EZY A  13     1832   1750   1078   -132    285   -391       O  
HETATM  194  C01 EZY A  13      26.213 -18.174 -20.108  1.00 24.35           C  
ANISOU  194  C01 EZY A  13     3397   3270   2586    -56    262   -412       C  
HETATM  195  C02 EZY A  13      24.828 -18.288 -22.254  1.00 29.52           C  
ANISOU  195  C02 EZY A  13     4066   3903   3250    -22    227   -459       C  
HETATM  196  C03 EZY A  13      23.676 -18.654 -22.933  1.00 31.18           C  
ANISOU  196  C03 EZY A  13     4279   4090   3476    -17    210   -492       C  
HETATM  197  C04 EZY A  13      22.642 -19.287 -22.264  1.00 31.11           C  
ANISOU  197  C04 EZY A  13     4263   4064   3494    -44    214   -515       C  
HETATM  198  C05 EZY A  13      22.762 -19.558 -20.912  1.00 29.65           C  
ANISOU  198  C05 EZY A  13     4067   3882   3318    -75    237   -506       C  
HETATM  199  C06 EZY A  13      23.915 -19.197 -20.235  1.00 28.19           C  
ANISOU  199  C06 EZY A  13     3881   3716   3114    -78    252   -474       C  
HETATM  200  C07 EZY A  13      24.950 -18.553 -20.897  1.00 27.80           C  
ANISOU  200  C07 EZY A  13     3837   3685   3040    -51    246   -450       C  
HETATM  201  N01 EZY A  13      25.893 -17.629 -22.981  1.00 31.81           N  
ANISOU  201  N01 EZY A  13     4362   4214   3512      4    223   -434       N  
HETATM  202  O01 EZY A  13      26.667 -18.272 -23.588  1.00 35.02           O  
ANISOU  202  O01 EZY A  13     4780   4631   3895     30    228   -419       O  
HETATM  203  O02 EZY A  13      25.978 -16.457 -22.970  1.00 31.98           O  
ANISOU  203  O02 EZY A  13     4374   4244   3533     -2    215   -429       O  
HETATM  204  HA2 EZY A  13      24.408 -15.968 -19.074  1.00 22.27           H  
HETATM  205  HA3 EZY A  13      24.834 -17.311 -18.724  1.00 22.27           H  
HETATM  206  H08 EZY A  13      26.245 -18.715 -19.303  1.00 29.34           H  
HETATM  207  H05 EZY A  13      26.988 -18.386 -20.652  1.00 29.34           H  
HETATM  208  H14 EZY A  13      23.596 -18.471 -23.841  1.00 37.52           H  
HETATM  209  H10 EZY A  13      21.870 -19.530 -22.722  1.00 37.45           H  
HETATM  210  H11 EZY A  13      22.070 -19.984 -20.459  1.00 35.70           H  
HETATM  211  H12 EZY A  13      23.991 -19.378 -19.326  1.00 33.94           H  
ATOM    212  N   LEU A  14      25.179 -15.024 -17.023  1.00 17.75           N  
ANISOU  212  N   LEU A  14     2497   2445   1803   -151    265   -424       N  
ATOM    213  CA ALEU A  14      25.603 -14.577 -15.702  0.81 20.38           C  
ANISOU  213  CA ALEU A  14     2820   2785   2137   -179    278   -408       C  
ATOM    214  CA BLEU A  14      25.604 -14.575 -15.702  0.19 20.34           C  
ANISOU  214  CA BLEU A  14     2816   2781   2132   -179    278   -408       C  
ATOM    215  C   LEU A  14      24.388 -14.185 -14.863  1.00  9.02           C  
ANISOU  215  C   LEU A  14     1361   1336    728   -212    280   -438       C  
ATOM    216  O   LEU A  14      23.538 -13.423 -15.313  1.00  9.82           O  
ANISOU  216  O   LEU A  14     1448   1435    849   -210    265   -464       O  
ATOM    217  CB ALEU A  14      26.573 -13.398 -15.828  0.81 22.12           C  
ANISOU  217  CB ALEU A  14     3037   3025   2341   -170    269   -382       C  
ATOM    218  CB BLEU A  14      26.571 -13.395 -15.833  0.19 21.79           C  
ANISOU  218  CB BLEU A  14     2996   2984   2300   -170    269   -382       C  
ATOM    219  CG ALEU A  14      27.282 -12.920 -14.561  0.81 22.07           C  
ANISOU  219  CG ALEU A  14     3025   3029   2331   -193    279   -358       C  
ATOM    220  CG BLEU A  14      27.553 -13.139 -14.687  0.19 21.20           C  
ANISOU  220  CG BLEU A  14     2920   2921   2215   -187    281   -350       C  
ATOM    221  CD1ALEU A  14      28.178 -14.005 -13.987  0.81 21.12           C  
ANISOU  221  CD1ALEU A  14     2919   2910   2195   -192    295   -329       C  
ATOM    222  CD1BLEU A  14      28.667 -12.219 -15.162  0.19 22.18           C  
ANISOU  222  CD1BLEU A  14     3044   3065   2318   -169    272   -320       C  
ATOM    223  CD2ALEU A  14      28.090 -11.670 -14.867  0.81 22.77           C  
ANISOU  223  CD2ALEU A  14     3109   3136   2405   -184    267   -336       C  
ATOM    224  CD2BLEU A  14      26.862 -12.539 -13.474  0.19 21.68           C  
ANISOU  224  CD2BLEU A  14     2965   2977   2296   -223    285   -367       C  
ATOM    225  H   LEU A  14      24.604 -14.505 -17.398  1.00 21.42           H  
ATOM    226  HA  LEU A  14      26.065 -15.301 -15.251  1.00 24.52           H  
ATOM    227  HB2ALEU A  14      27.263 -13.646 -16.463  0.81 26.65           H  
ATOM    228  HB2BLEU A  14      27.102 -13.532 -16.633  0.19 26.26           H  
ATOM    229  HB3ALEU A  14      26.078 -12.641 -16.178  0.81 26.65           H  
ATOM    230  HB3BLEU A  14      26.043 -12.588 -15.937  0.19 26.26           H  
ATOM    231  HG ALEU A  14      26.618 -12.692 -13.892  0.81 26.60           H  
ATOM    232  HG BLEU A  14      27.954 -13.981 -14.419  0.19 25.56           H  
ATOM    233 HD11ALEU A  14      28.610 -13.667 -13.187  0.81 25.45           H  
ATOM    234 HD11BLEU A  14      29.283 -12.064 -14.429  0.19 26.73           H  
ATOM    235 HD12ALEU A  14      27.635 -14.779 -13.768  0.81 25.45           H  
ATOM    236 HD12BLEU A  14      29.132 -12.642 -15.901  0.19 26.73           H  
ATOM    237 HD13ALEU A  14      28.846 -14.245 -14.648  0.81 25.45           H  
ATOM    238 HD13BLEU A  14      28.280 -11.378 -15.453  0.19 26.73           H  
ATOM    239 HD21ALEU A  14      27.490 -10.977 -15.185  0.81 27.43           H  
ATOM    240 HD21BLEU A  14      26.180 -13.155 -13.163  0.19 26.13           H  
ATOM    241 HD22ALEU A  14      28.535 -11.376 -14.057  0.81 27.43           H  
ATOM    242 HD22BLEU A  14      27.520 -12.394 -12.775  0.19 26.13           H  
ATOM    243 HD23ALEU A  14      28.747 -11.879 -15.549  0.81 27.43           H  
ATOM    244 HD23BLEU A  14      26.456 -11.695 -13.727  0.19 26.13           H  
HETATM  245  N   ORN A  15      24.313 -14.712 -13.643  1.00 14.92           N  
ANISOU  245  N   ORN A  15     2109   2080   1482   -241    299   -435       N  
HETATM  246  CA  ORN A  15      23.287 -14.481 -12.866  1.00 12.59           C  
ANISOU  246  CA  ORN A  15     1795   1777   1211   -270    305   -460       C  
HETATM  247  CB  ORN A  15      23.056 -15.640 -11.922  1.00 17.26           C  
ANISOU  247  CB  ORN A  15     2396   2357   1804   -297    328   -461       C  
HETATM  248  CG  ORN A  15      23.083 -16.971 -12.650  1.00 15.93           C  
ANISOU  248  CG  ORN A  15     2248   2178   1627   -280    330   -461       C  
HETATM  249  CD  ORN A  15      22.989 -18.111 -11.656  1.00 17.32           C  
ANISOU  249  CD  ORN A  15     2438   2342   1801   -309    352   -458       C  
HETATM  250  NE  ORN A  15      21.773 -18.037 -10.908  1.00 16.22           N  
ANISOU  250  NE  ORN A  15     2280   2195   1688   -345    364   -487       N  
HETATM  251  C   ORN A  15      23.362 -13.291 -12.240  1.00 17.58           C  
ANISOU  251  C   ORN A  15     2413   2419   1849   -284    302   -458       C  
HETATM  252  O   ORN A  15      24.245 -13.084 -11.430  1.00 11.56           O  
ANISOU  252  O   ORN A  15     1656   1664   1071   -295    310   -432       O  
HETATM  253  H   ORN A  15      24.974 -15.250 -13.313  1.00 18.02           H  
HETATM  254  HA  ORN A  15      22.455 -14.518 -13.384  1.00 15.22           H  
HETATM  255  HB2 ORN A  15      22.182 -15.535 -11.497  1.00 20.82           H  
HETATM  256  HB3 ORN A  15      23.749 -15.633 -11.233  1.00 20.82           H  
HETATM  257  HG2 ORN A  15      23.922 -17.048 -13.147  1.00 19.23           H  
HETATM  258  HG3 ORN A  15      22.331 -17.017 -13.273  1.00 19.23           H  
HETATM  259  HD2 ORN A  15      23.750 -18.065 -11.039  1.00 20.90           H  
HETATM  260  HD3 ORN A  15      23.018 -18.963 -12.139  1.00 20.90           H  
HETATM  261  HE1 ORN A  15      21.732 -18.740 -10.319  1.00 19.58           H  
HETATM  262  HE2 ORN A  15      21.748 -17.246 -10.442  1.00 19.58           H  
HETATM  263  HN3 ORN A  15      21.057 -18.076 -11.482  1.00 19.58           H  
ATOM    264  N   VAL A  16      22.391 -12.359 -12.538  1.00 10.05           N  
ANISOU  264  N   VAL A  16     1436   1463    918   -285    289   -488       N  
ATOM    265  CA  VAL A  16      22.343 -11.035 -11.928  1.00  8.82           C  
ANISOU  265  CA  VAL A  16     1264   1316    770   -298    284   -491       C  
ATOM    266  C   VAL A  16      20.969 -10.796 -11.313  1.00  9.14           C  
ANISOU  266  C   VAL A  16     1278   1350    844   -321    290   -527       C  
ATOM    267  O   VAL A  16      19.993 -10.545 -12.022  1.00 10.90           O  
ANISOU  267  O   VAL A  16     1486   1567   1089   -309    275   -555       O  
ATOM    268  CB  VAL A  16      22.678  -9.934 -12.949  1.00 12.35           C  
ANISOU  268  CB  VAL A  16     1710   1771   1210   -271    258   -489       C  
ATOM    269  CG1 VAL A  16      22.653  -8.557 -12.287  1.00 13.58           C  
ANISOU  269  CG1 VAL A  16     1851   1935   1374   -285    251   -493       C  
ATOM    270  CG2 VAL A  16      24.035 -10.189 -13.583  1.00 11.92           C  
ANISOU  270  CG2 VAL A  16     1679   1727   1122   -248    255   -453       C  
ATOM    271  H   VAL A  16      21.762 -12.506 -13.105  1.00 12.17           H  
ATOM    272  HA  VAL A  16      23.001 -10.992 -11.216  1.00 10.02           H  
ATOM    273  HB  VAL A  16      22.011  -9.941 -13.654  1.00 14.93           H  
ATOM    274 HG11 VAL A  16      22.867  -7.883 -12.951  1.00 16.41           H  
ATOM    275 HG12 VAL A  16      21.767  -8.397 -11.926  1.00 16.41           H  
ATOM    276 HG13 VAL A  16      23.309  -8.539 -11.573  1.00 16.41           H  
ATOM    277 HG21 VAL A  16      24.223  -9.484 -14.221  1.00 14.42           H  
ATOM    278 HG22 VAL A  16      24.711 -10.196 -12.887  1.00 14.42           H  
ATOM    279 HG23 VAL A  16      24.016 -11.048 -14.034  1.00 14.42           H  
TER     280      VAL A  16                                                      
HETATM  281  N   ORN B   1      31.822  -6.190 -20.835  1.00 19.81           N  
ANISOU  281  N   ORN B   1     2893   2489   2146   -786   -863   -135       N  
HETATM  282  CA  ORN B   1      30.460  -5.622 -21.064  1.00 18.78           C  
ANISOU  282  CA  ORN B   1     2940   2225   1971   -773   -775    -97       C  
HETATM  283  CB  ORN B   1      30.435  -4.778 -22.352  1.00 17.73           C  
ANISOU  283  CB  ORN B   1     2841   2039   1857   -843   -667    -93       C  
HETATM  284  CG  ORN B   1      31.224  -3.462 -22.249  1.00 28.35           C  
ANISOU  284  CG  ORN B   1     4217   3362   3191  -1027   -645   -137       C  
HETATM  285  CD  ORN B   1      30.412  -2.307 -21.624  1.00 30.05           C  
ANISOU  285  CD  ORN B   1     4624   3403   3389  -1055   -633   -154       C  
HETATM  286  NE  ORN B   1      29.210  -2.007 -22.389  1.00 29.12           N  
ANISOU  286  NE  ORN B   1     4625   3147   3292   -962   -582    -82       N  
HETATM  287  C   ORN B   1      29.382  -6.730 -21.152  1.00 16.62           C  
ANISOU  287  C   ORN B   1     2699   1914   1700   -636   -783    -31       C  
HETATM  288  O   ORN B   1      29.677  -7.925 -21.220  1.00 16.69           O  
ANISOU  288  O   ORN B   1     2624   1954   1762   -555   -848     -9       O  
HETATM  289  H1  ORN B   1      31.839  -6.927 -20.126  1.00 23.89           H  
HETATM  290  H2  ORN B   1      32.230  -6.612 -21.673  1.00 23.89           H  
HETATM  291  H3  ORN B   1      32.504  -5.495 -20.523  1.00 23.89           H  
HETATM  292  HA  ORN B   1      30.239  -5.025 -20.174  1.00 22.65           H  
HETATM  293  HB2 ORN B   1      30.837  -5.364 -23.190  1.00 20.71           H  
HETATM  294  HB3 ORN B   1      29.388  -4.506 -22.547  1.00 20.71           H  
HETATM  295  HG2 ORN B   1      31.537  -3.161 -23.255  1.00 34.13           H  
HETATM  296  HG3 ORN B   1      32.120  -3.635 -21.642  1.00 34.13           H  
HETATM  297  HD2 ORN B   1      30.123  -2.592 -20.608  1.00 36.17           H  
HETATM  298  HD3 ORN B   1      31.040  -1.412 -21.608  1.00 36.17           H  
HETATM  299  HE1 ORN B   1      29.339  -1.401 -23.197  1.00 35.06           H  
ATOM    300  N   CYS B   2      28.083  -6.283 -21.140  1.00 15.94           N  
ANISOU  300  N   CYS B   2     2736   1750   1571   -612   -722    -11       N  
ATOM    301  CA  CYS B   2      26.946  -7.189 -21.218  1.00 15.17           C  
ANISOU  301  CA  CYS B   2     2663   1638   1461   -525   -715     41       C  
ATOM    302  C   CYS B   2      26.105  -6.868 -22.448  1.00 14.56           C  
ANISOU  302  C   CYS B   2     2613   1514   1405   -484   -635     57       C  
ATOM    303  O   CYS B   2      26.025  -5.717 -22.877  1.00 14.87           O  
ANISOU  303  O   CYS B   2     2706   1496   1448   -512   -591     49       O  
ATOM    304  CB  CYS B   2      26.084  -7.095 -19.956  1.00 15.43           C  
ANISOU  304  CB  CYS B   2     2770   1693   1399   -540   -723     38       C  
ATOM    305  SG  CYS B   2      26.939  -7.478 -18.405  1.00 16.60           S  
ANISOU  305  SG  CYS B   2     2912   1937   1459   -618   -844     51       S  
ATOM    306  HA  CYS B   2      27.268  -8.100 -21.299  1.00 17.63           H  
ATOM    307  HB2 CYS B   2      25.741  -6.191 -19.884  1.00 17.94           H  
ATOM    308  HB3 CYS B   2      25.344  -7.716 -20.042  1.00 17.94           H  
ATOM    309  N   VAL B   3      25.478  -7.895 -23.011  1.00 14.03           N  
ANISOU  309  N   VAL B   3     2517   1462   1351   -427   -632     88       N  
ATOM    310  CA  VAL B   3      24.636  -7.753 -24.192  1.00 14.50           C  
ANISOU  310  CA  VAL B   3     2585   1518   1407   -396   -580    107       C  
ATOM    311  C   VAL B   3      23.186  -7.716 -23.736  1.00 15.14           C  
ANISOU  311  C   VAL B   3     2699   1602   1451   -352   -566    120       C  
ATOM    312  O   VAL B   3      22.694  -8.673 -23.125  1.00 14.25           O  
ANISOU  312  O   VAL B   3     2573   1523   1317   -358   -584    130       O  
ATOM    313  CB  VAL B   3      24.871  -8.899 -25.188  1.00 14.79           C  
ANISOU  313  CB  VAL B   3     2551   1595   1474   -382   -579     90       C  
ATOM    314  CG1 VAL B   3      24.086  -8.661 -26.468  1.00 17.23           C  
ANISOU  314  CG1 VAL B   3     2866   1941   1738   -379   -536    110       C  
ATOM    315  CG2 VAL B   3      26.357  -9.051 -25.480  1.00 18.13           C  
ANISOU  315  CG2 VAL B   3     2891   2053   1943   -410   -584     34       C  
ATOM    316  H   VAL B   3      25.527  -8.702 -22.720  1.00 16.26           H  
ATOM    317  HA  VAL B   3      24.840  -6.915 -24.635  1.00 17.51           H  
ATOM    318  HB  VAL B   3      24.558  -9.728 -24.794  1.00 17.86           H  
ATOM    319 HG11 VAL B   3      24.250  -9.396 -27.080  1.00 20.79           H  
ATOM    320 HG12 VAL B   3      23.141  -8.613 -26.255  1.00 20.79           H  
ATOM    321 HG13 VAL B   3      24.378  -7.827 -26.867  1.00 20.79           H  
ATOM    322 HG21 VAL B   3      26.482  -9.778 -26.109  1.00 21.87           H  
ATOM    323 HG22 VAL B   3      26.690  -8.223 -25.860  1.00 21.87           H  
ATOM    324 HG23 VAL B   3      26.823  -9.246 -24.652  1.00 21.87           H  
ATOM    325  N   PHE B   4      22.503  -6.615 -24.028  1.00 13.90           N  
ANISOU  325  N   PHE B   4     2579   1409   1293   -312   -539    122       N  
ATOM    326  CA  PHE B   4      21.087  -6.464 -23.733  1.00 15.34           C  
ANISOU  326  CA  PHE B   4     2745   1624   1460   -243   -520    103       C  
ATOM    327  C   PHE B   4      20.294  -6.509 -25.030  1.00 16.52           C  
ANISOU  327  C   PHE B   4     2858   1805   1615   -191   -530    154       C  
ATOM    328  O   PHE B   4      20.737  -5.988 -26.059  1.00 17.17           O  
ANISOU  328  O   PHE B   4     2976   1846   1704   -199   -548    211       O  
ATOM    329  CB  PHE B   4      20.817  -5.152 -22.993  1.00 16.49           C  
ANISOU  329  CB  PHE B   4     2940   1697   1630   -194   -501     36       C  
ATOM    330  CG  PHE B   4      21.487  -5.068 -21.653  1.00 19.81           C  
ANISOU  330  CG  PHE B   4     3392   2126   2007   -266   -493    -36       C  
ATOM    331  CD1 PHE B   4      22.691  -4.402 -21.506  1.00 20.61           C  
ANISOU  331  CD1 PHE B   4     3554   2146   2132   -333   -514    -50       C  
ATOM    332  CD2 PHE B   4      20.914  -5.661 -20.541  1.00 24.23           C  
ANISOU  332  CD2 PHE B   4     3918   2807   2481   -299   -467    -84       C  
ATOM    333  CE1 PHE B   4      23.309  -4.323 -20.274  1.00 23.26           C  
ANISOU  333  CE1 PHE B   4     3909   2521   2409   -413   -525   -121       C  
ATOM    334  CE2 PHE B   4      21.528  -5.587 -19.306  1.00 25.41           C  
ANISOU  334  CE2 PHE B   4     4104   2999   2551   -387   -474   -137       C  
ATOM    335  CZ  PHE B   4      22.727  -4.917 -19.172  1.00 24.81           C  
ANISOU  335  CZ  PHE B   4     4082   2843   2503   -435   -511   -160       C  
ATOM    336  H   PHE B   4      22.849  -5.925 -24.408  1.00 16.11           H  
ATOM    337  HA  PHE B   4      20.795  -7.198 -23.171  1.00 18.52           H  
ATOM    338  HB2 PHE B   4      21.141  -4.415 -23.534  1.00 19.90           H  
ATOM    339  HB3 PHE B   4      19.861  -5.063 -22.854  1.00 19.90           H  
ATOM    340  HD1 PHE B   4      23.087  -4.000 -22.245  1.00 24.85           H  
ATOM    341  HD2 PHE B   4      20.105  -6.112 -20.626  1.00 29.19           H  
ATOM    342  HE1 PHE B   4      24.118  -3.872 -20.187  1.00 28.03           H  
ATOM    343  HE2 PHE B   4      21.133  -5.987 -18.565  1.00 30.61           H  
ATOM    344  HZ  PHE B   4      23.142  -4.866 -18.341  1.00 29.89           H  
ATOM    345  N   PHE B   5      19.124  -7.134 -24.981  1.00 14.40           N  
ANISOU  345  N   PHE B   5     2516   1635   1321   -165   -523    138       N  
ATOM    346  CA  PHE B   5      18.277  -7.305 -26.155  1.00 14.73           C  
ANISOU  346  CA  PHE B   5     2499   1750   1349   -129   -550    177       C  
ATOM    347  C   PHE B   5      17.028  -6.450 -25.984  1.00 15.90           C  
ANISOU  347  C   PHE B   5     2585   1929   1528     -4   -562    152       C  
ATOM    348  O   PHE B   5      16.185  -6.733 -25.127  1.00 16.31           O  
ANISOU  348  O   PHE B   5     2552   2078   1569      6   -520     75       O  
ATOM    349  CB  PHE B   5      17.935  -8.777 -26.358  1.00 14.37           C  
ANISOU  349  CB  PHE B   5     2394   1801   1264   -214   -544    159       C  
ATOM    350  CG  PHE B   5      19.127  -9.625 -26.691  1.00 14.08           C  
ANISOU  350  CG  PHE B   5     2400   1713   1237   -289   -547    155       C  
ATOM    351  CD1 PHE B   5      19.576  -9.727 -27.997  1.00 13.87           C  
ANISOU  351  CD1 PHE B   5     2370   1712   1187   -310   -555    158       C  
ATOM    352  CD2 PHE B   5      19.810 -10.308 -25.699  1.00 15.10           C  
ANISOU  352  CD2 PHE B   5     2563   1781   1394   -334   -549    142       C  
ATOM    353  CE1 PHE B   5      20.676 -10.502 -28.309  1.00 15.05           C  
ANISOU  353  CE1 PHE B   5     2523   1834   1362   -357   -543    105       C  
ATOM    354  CE2 PHE B   5      20.911 -11.085 -26.005  1.00 15.08           C  
ANISOU  354  CE2 PHE B   5     2572   1721   1439   -359   -569    119       C  
ATOM    355  CZ  PHE B   5      21.344 -11.181 -27.311  1.00 13.91           C  
ANISOU  355  CZ  PHE B   5     2394   1604   1287   -362   -555     80       C  
ATOM    356  H   PHE B   5      18.792  -7.475 -24.264  1.00 16.71           H  
ATOM    357  HA  PHE B   5      18.753  -6.994 -26.941  1.00 17.11           H  
ATOM    358  HB2 PHE B   5      17.542  -9.123 -25.541  1.00 16.67           H  
ATOM    359  HB3 PHE B   5      17.300  -8.854 -27.087  1.00 16.67           H  
ATOM    360  HD1 PHE B   5      19.128  -9.272 -28.673  1.00 16.07           H  
ATOM    361  HD2 PHE B   5      19.521 -10.247 -24.817  1.00 18.24           H  
ATOM    362  HE1 PHE B   5      20.967 -10.565 -29.190  1.00 18.18           H  
ATOM    363  HE2 PHE B   5      21.360 -11.542 -25.331  1.00 18.22           H  
ATOM    364  HZ  PHE B   5      22.085 -11.703 -27.519  1.00 16.81           H  
ATOM    365  N   CYS B   6      16.917  -5.405 -26.804  1.00 16.81           N  
ANISOU  365  N   CYS B   6     2737   1968   1685     89   -625    220       N  
ATOM    366  CA  CYS B   6      15.841  -4.433 -26.705  1.00 18.46           C  
ANISOU  366  CA  CYS B   6     2888   2154   1971    261   -668    197       C  
ATOM    367  C   CYS B   6      15.218  -4.214 -28.074  1.00 19.54           C  
ANISOU  367  C   CYS B   6     2990   2339   2095    326   -779    317       C  
ATOM    368  O   CYS B   6      15.869  -4.391 -29.108  1.00 19.21           O  
ANISOU  368  O   CYS B   6     3024   2298   1976    228   -817    431       O  
ATOM    369  CB  CYS B   6      16.349  -3.096 -26.154  1.00 19.36           C  
ANISOU  369  CB  CYS B   6     3121   2048   2187    338   -675    172       C  
ATOM    370  SG  CYS B   6      17.354  -3.238 -24.662  1.00 18.36           S  
ANISOU  370  SG  CYS B   6     3060   1880   2036    222   -570     46       S  
ATOM    371  H   CYS B   6      17.471  -5.237 -27.441  1.00 19.61           H  
ATOM    372  HA  CYS B   6      15.156  -4.771 -26.107  1.00 21.58           H  
ATOM    373  HB2 CYS B   6      16.890  -2.665 -26.834  1.00 22.66           H  
ATOM    374  HB3 CYS B   6      15.585  -2.537 -25.942  1.00 22.66           H  
ATOM    375  N   GLU B   7      13.951  -3.817 -28.071  1.00 21.18           N  
ANISOU  375  N   GLU B   7     3066   2615   2367    491   -836    284       N  
ATOM    376  CA  GLU B   7      13.237  -3.548 -29.307  1.00 29.35           C  
ANISOU  376  CA  GLU B   7     4048   3716   3389    576   -979    410       C  
ATOM    377  C   GLU B   7      13.319  -2.069 -29.658  1.00 34.78           C  
ANISOU  377  C   GLU B   7     4857   4161   4196    739  -1104    528       C  
ATOM    378  O   GLU B   7      13.365  -1.201 -28.781  1.00 31.28           O  
ANISOU  378  O   GLU B   7     4459   3530   3897    862  -1080    438       O  
ATOM    379  CB  GLU B   7      11.772  -3.977 -29.195  1.00 36.99           C  
ANISOU  379  CB  GLU B   7     4768   4917   4370    671  -1000    315       C  
ATOM    380  CG  GLU B   7      10.978  -3.223 -28.144  1.00 43.78           C  
ANISOU  380  CG  GLU B   7     5506   5749   5381    877   -970    158       C  
ATOM    381  CD  GLU B   7       9.571  -3.763 -27.974  1.00 48.77           C  
ANISOU  381  CD  GLU B   7     5847   6675   6007    931   -959     34       C  
ATOM    382  OE1 GLU B   7       8.925  -4.083 -28.995  1.00 50.84           O  
ANISOU  382  OE1 GLU B   7     5999   7100   6219    937  -1078    122       O  
ATOM    383  OE2 GLU B   7       9.115  -3.875 -26.816  1.00 50.42           O1-
ANISOU  383  OE2 GLU B   7     5928   6985   6243    944   -829   -158       O1-
ATOM    384  H   GLU B   7      13.482  -3.696 -27.361  1.00 24.85           H  
ATOM    385  HA  GLU B   7      13.645  -4.053 -30.028  1.00 35.34           H  
ATOM    386  HB2 GLU B   7      11.339  -3.832 -30.051  1.00 44.50           H  
ATOM    387  HB3 GLU B   7      11.740  -4.919 -28.968  1.00 44.50           H  
ATOM    388  HG2 GLU B   7      11.433  -3.298 -27.290  1.00 52.66           H  
ATOM    389  HG3 GLU B   7      10.913  -2.291 -28.405  1.00 52.66           H  
ATOM    390  N   ASP B   8      13.355  -1.793 -30.958  1.00 66.20           N  
ANISOU  390  N   ASP B   8     8906   8140   8105    721  -1245    731       N  
ATOM    391  CA  ASP B   8      13.269  -0.428 -31.464  1.00 71.82           C  
ANISOU  391  CA  ASP B   8     9747   8614   8927    870  -1413    903       C  
ATOM    392  C   ASP B   8      11.926  -0.241 -32.162  1.00 72.49           C  
ANISOU  392  C   ASP B   8     9671   8826   9044   1068  -1600    982       C  
ATOM    393  O   ASP B   8      11.840   0.402 -33.208  1.00 74.64           O  
ANISOU  393  O   ASP B   8    10007   9062   9291   1069  -1704   1185       O  
ATOM    394  CB  ASP B   8      14.423  -0.125 -32.423  1.00 72.86           C  
ANISOU  394  CB  ASP B   8    10095   8657   8931    659  -1430   1109       C  
ATOM    395  CG  ASP B   8      14.391  -0.990 -33.668  1.00 73.43           C  
ANISOU  395  CG  ASP B   8    10098   9024   8780    489  -1424   1190       C  
ATOM    396  OD1 ASP B   8      13.919  -2.143 -33.582  1.00 72.22           O1-
ANISOU  396  OD1 ASP B   8     9800   9101   8539    456  -1405   1081       O1-
ATOM    397  OD2 ASP B   8      14.837  -0.516 -34.733  1.00 75.08           O  
ANISOU  397  OD2 ASP B   8    10400   9234   8893    378  -1436   1344       O  
ATOM    398  H   ASP B   8      13.429  -2.387 -31.575  1.00 79.55           H  
ATOM    399  HA  ASP B   8      13.317   0.194 -30.721  1.00 86.30           H  
ATOM    400  HB2 ASP B   8      14.368   0.803 -32.700  1.00 87.55           H  
ATOM    401  HB3 ASP B   8      15.264  -0.286 -31.967  1.00 87.55           H  
HETATM  402  N   ORN B   9       7.788  -4.790 -34.057  1.00 65.87           N  
ANISOU  402  N   ORN B   9     7803   9531   7692    791  -1695    684       N  
HETATM  403  CA  ORN B   9       9.112  -4.102 -34.127  1.00 64.54           C  
ANISOU  403  CA  ORN B   9     7939   9053   7530    765  -1668    819       C  
HETATM  404  CB  ORN B   9       9.290  -3.148 -32.931  1.00 67.04           C  
ANISOU  404  CB  ORN B   9     8306   9092   8073    963  -1604    747       C  
HETATM  405  CG  ORN B   9       9.376  -1.663 -33.332  1.00 70.12           C  
ANISOU  405  CG  ORN B   9     8839   9210   8592   1179  -1792    943       C  
HETATM  406  CD  ORN B   9       9.513  -0.748 -32.114  1.00 70.22           C  
ANISOU  406  CD  ORN B   9     8899   8938   8844   1371  -1720    815       C  
HETATM  407  NE  ORN B   9      10.843  -0.839 -31.554  1.00 66.10           N  
ANISOU  407  NE  ORN B   9     8594   8238   8283   1180  -1549    782       N  
HETATM  408  C   ORN B   9      10.284  -5.129 -34.202  1.00 57.02           C  
ANISOU  408  C   ORN B   9     7136   8102   6425    472  -1494    765       C  
HETATM  409  O   ORN B   9      10.076  -6.342 -34.283  1.00 55.38           O  
ANISOU  409  O   ORN B   9     6833   8091   6119    302  -1416    641       O  
HETATM  410  H2  ORN B   9       7.707  -5.577 -34.706  1.00 79.15           H  
HETATM  411  H   ORN B   9       7.000  -4.176 -34.276  1.00 79.15           H  
HETATM  412  H3  ORN B   9       7.581  -5.179 -33.133  1.00 79.15           H  
HETATM  413  HA  ORN B   9       9.107  -3.561 -35.078  1.00 77.56           H  
HETATM  414  HB2 ORN B   9       8.426  -3.263 -32.260  1.00 80.56           H  
HETATM  415  HB3 ORN B   9      10.218  -3.408 -32.404  1.00 80.56           H  
HETATM  416  HG2 ORN B   9      10.247  -1.524 -33.983  1.00 84.25           H  
HETATM  417  HG3 ORN B   9       8.472  -1.386 -33.886  1.00 84.25           H  
HETATM  418  HD2 ORN B   9       8.791  -1.064 -31.355  1.00 84.38           H  
HETATM  419  HD3 ORN B   9       9.323   0.285 -32.422  1.00 84.38           H  
HETATM  420  HE1 ORN B   9      10.925  -1.373 -30.691  1.00 79.43           H  
ATOM    421  N   ALA B  10      11.550  -4.594 -34.191  1.00 42.49           N  
ANISOU  421  N   ALA B  10     5533   6026   4585    417  -1443    854       N  
ATOM    422  CA  ALA B  10      12.741  -5.434 -34.275  1.00 36.04           C  
ANISOU  422  CA  ALA B  10     4834   5204   3656    185  -1293    794       C  
ATOM    423  C   ALA B  10      13.534  -5.461 -32.973  1.00 31.45           C  
ANISOU  423  C   ALA B  10     4323   4427   3201    184  -1135    678       C  
ATOM    424  O   ALA B  10      13.766  -4.424 -32.353  1.00 30.78           O  
ANISOU  424  O   ALA B  10     4319   4134   3244    307  -1145    715       O  
ATOM    425  CB  ALA B  10      13.632  -4.954 -35.408  1.00 35.67           C  
ANISOU  425  CB  ALA B  10     4946   5117   3490     82  -1298    932       C  
ATOM    426  H   ALA B  10      11.719  -3.752 -34.145  1.00 51.10           H  
ATOM    427  HA  ALA B  10      12.469  -6.343 -34.475  1.00 43.36           H  
ATOM    428  HB1 ALA B  10      14.418  -5.520 -35.452  1.00 42.92           H  
ATOM    429  HB2 ALA B  10      13.138  -5.008 -36.242  1.00 42.92           H  
ATOM    430  HB3 ALA B  10      13.894  -4.036 -35.237  1.00 42.92           H  
ATOM    431  N   ILE B  11      13.955  -6.657 -32.573  1.00 24.22           N  
ANISOU  431  N   ILE B  11     3384   3570   2250     40  -1005    539       N  
ATOM    432  CA  ILE B  11      14.845  -6.816 -31.429  1.00 23.12           C  
ANISOU  432  CA  ILE B  11     3318   3272   2193     10   -879    454       C  
ATOM    433  C   ILE B  11      16.266  -6.490 -31.863  1.00 20.86           C  
ANISOU  433  C   ILE B  11     3186   2876   1865    -83   -848    517       C  
ATOM    434  O   ILE B  11      16.696  -6.856 -32.964  1.00 19.49           O  
ANISOU  434  O   ILE B  11     3037   2805   1563   -201   -856    549       O  
ATOM    435  CB  ILE B  11      14.749  -8.244 -30.859  1.00 22.00           C  
ANISOU  435  CB  ILE B  11     3107   3212   2041   -105   -788    315       C  
ATOM    436  CG1 ILE B  11      13.327  -8.539 -30.367  1.00 25.29           C  
ANISOU  436  CG1 ILE B  11     3355   3771   2482    -62   -799    249       C  
ATOM    437  CG2 ILE B  11      15.766  -8.450 -29.736  1.00 22.43           C  
ANISOU  437  CG2 ILE B  11     3247   3113   2161   -141   -694    261       C  
ATOM    438  CD1 ILE B  11      12.881  -7.705 -29.179  1.00 28.54           C  
ANISOU  438  CD1 ILE B  11     3721   4125   2999     80   -769    210       C  
ATOM    439  H   ILE B  11      13.738  -7.398 -32.952  1.00 29.18           H  
ATOM    440  HA  ILE B  11      14.587  -6.192 -30.733  1.00 27.85           H  
ATOM    441  HB  ILE B  11      14.956  -8.867 -31.573  1.00 26.52           H  
ATOM    442 HG12 ILE B  11      12.707  -8.372 -31.093  1.00 30.46           H  
ATOM    443 HG13 ILE B  11      13.278  -9.472 -30.105  1.00 30.46           H  
ATOM    444 HG21 ILE B  11      15.683  -9.356 -29.397  1.00 27.03           H  
ATOM    445 HG22 ILE B  11      16.659  -8.310 -30.089  1.00 27.03           H  
ATOM    446 HG23 ILE B  11      15.586  -7.814 -29.026  1.00 27.03           H  
ATOM    447 HD11 ILE B  11      11.976  -7.959 -28.938  1.00 34.36           H  
ATOM    448 HD12 ILE B  11      13.480  -7.870 -28.435  1.00 34.36           H  
ATOM    449 HD13 ILE B  11      12.908  -6.767 -29.425  1.00 34.36           H  
ATOM    450  N   ILE B  12      16.999  -5.802 -30.993  1.00 18.18           N  
ANISOU  450  N   ILE B  12     2934   2354   1618    -49   -804    515       N  
ATOM    451  CA  ILE B  12      18.369  -5.389 -31.273  1.00 20.23           C  
ANISOU  451  CA  ILE B  12     3316   2521   1849   -154   -768    564       C  
ATOM    452  C   ILE B  12      19.276  -5.840 -30.129  1.00 16.52           C  
ANISOU  452  C   ILE B  12     2853   1977   1447   -194   -672    448       C  
ATOM    453  O   ILE B  12      18.837  -5.878 -28.984  1.00 16.08           O  
ANISOU  453  O   ILE B  12     2766   1874   1468   -121   -653    378       O  
ATOM    454  CB  ILE B  12      18.446  -3.854 -31.474  1.00 23.13           C  
ANISOU  454  CB  ILE B  12     3808   2717   2261    -97   -848    712       C  
ATOM    455  CG1 ILE B  12      17.997  -3.473 -32.888  1.00 26.84           C  
ANISOU  455  CG1 ILE B  12     4311   3272   2613   -119   -964    886       C  
ATOM    456  CG2 ILE B  12      19.850  -3.313 -31.167  1.00 22.78           C  
ANISOU  456  CG2 ILE B  12     3881   2540   2237   -214   -785    720       C  
ATOM    457  CD1 ILE B  12      19.017  -3.757 -33.976  1.00 29.42           C  
ANISOU  457  CD1 ILE B  12     4671   3726   2781   -329   -898    921       C  
ATOM    458  H   ILE B  12      16.718  -5.557 -30.218  1.00 21.24           H  
ATOM    459  HA  ILE B  12      18.672  -5.818 -32.089  1.00 24.39           H  
ATOM    460  HB  ILE B  12      17.829  -3.444 -30.847  1.00 27.86           H  
ATOM    461 HG12 ILE B  12      17.193  -3.971 -33.102  1.00 32.32           H  
ATOM    462 HG13 ILE B  12      17.806  -2.522 -32.906  1.00 32.32           H  
ATOM    463 HG21 ILE B  12      19.854  -2.353 -31.305  1.00 27.46           H  
ATOM    464 HG22 ILE B  12      20.072  -3.516 -30.246  1.00 27.46           H  
ATOM    465 HG23 ILE B  12      20.488  -3.736 -31.763  1.00 27.46           H  
ATOM    466 HD11 ILE B  12      18.650  -3.486 -34.831  1.00 35.42           H  
ATOM    467 HD12 ILE B  12      19.826  -3.256 -33.788  1.00 35.42           H  
ATOM    468 HD13 ILE B  12      19.211  -4.708 -33.985  1.00 35.42           H  
HETATM  469  N   EZY B  13      20.531  -6.179 -30.422  1.00 29.04           N  
ANISOU  469  N   EZY B  13     4463   3577   2993   -314   -616    421       N  
HETATM  470  CA  EZY B  13      21.488  -6.424 -29.343  1.00 26.99           C  
ANISOU  470  CA  EZY B  13     4205   3244   2806   -338   -563    337       C  
HETATM  471  C   EZY B  13      22.207  -5.361 -29.029  1.00 26.25           C  
ANISOU  471  C   EZY B  13     4191   3040   2744   -369   -561    376       C  
HETATM  472  O   EZY B  13      22.876  -4.827 -29.846  1.00 27.51           O  
ANISOU  472  O   EZY B  13     4395   3208   2848   -466   -553    441       O  
HETATM  473  C01 EZY B  13      21.158  -6.461 -31.714  1.00 32.43           C  
ANISOU  473  C01 EZY B  13     4889   4132   3301   -438   -595    441       C  
HETATM  474  C02 EZY B  13      22.223  -8.703 -32.261  1.00 37.39           C  
ANISOU  474  C02 EZY B  13     5373   4938   3895   -545   -481    184       C  
HETATM  475  C03 EZY B  13      22.127 -10.056 -32.539  1.00 35.39           C  
ANISOU  475  C03 EZY B  13     5048   4747   3651   -553   -457     39       C  
HETATM  476  C04 EZY B  13      20.887 -10.671 -32.578  1.00 33.47           C  
ANISOU  476  C04 EZY B  13     4785   4530   3401   -528   -503     28       C  
HETATM  477  C05 EZY B  13      19.741  -9.931 -32.339  1.00 33.71           C  
ANISOU  477  C05 EZY B  13     4833   4559   3416   -470   -569    151       C  
HETATM  478  C06 EZY B  13      19.837  -8.578 -32.062  1.00 35.30           C  
ANISOU  478  C06 EZY B  13     5098   4685   3628   -420   -597    282       C  
HETATM  479  C07 EZY B  13      21.075  -7.959 -32.025  1.00 35.31           C  
ANISOU  479  C07 EZY B  13     5155   4625   3636   -469   -555    304       C  
HETATM  480  N01 EZY B  13      23.530  -8.074 -32.226  1.00 39.84           N  
ANISOU  480  N01 EZY B  13     5699   5231   4206   -616   -431    190       N  
HETATM  481  O01 EZY B  13      23.967  -7.574 -33.196  1.00 42.15           O  
ANISOU  481  O01 EZY B  13     6010   5629   4378   -730   -401    235       O  
HETATM  482  O02 EZY B  13      24.148  -8.061 -31.227  1.00 38.43           O  
ANISOU  482  O02 EZY B  13     5512   4955   4134   -582   -423    153       O  
HETATM  483  HA2 EZY B  13      21.302  -7.043 -28.620  1.00 32.50           H  
HETATM  484  HA3 EZY B  13      22.085  -7.001 -29.844  1.00 32.50           H  
HETATM  485  H08 EZY B  13      22.088  -6.190 -31.685  1.00 39.03           H  
HETATM  486  H05 EZY B  13      20.699  -5.963 -32.409  1.00 39.03           H  
HETATM  487  H14 EZY B  13      22.897 -10.553 -32.700  1.00 42.58           H  
HETATM  488  H10 EZY B  13      20.823 -11.580 -32.764  1.00 40.27           H  
HETATM  489  H11 EZY B  13      18.908 -10.343 -32.365  1.00 40.57           H  
HETATM  490  H12 EZY B  13      19.066  -8.082 -31.902  1.00 42.47           H  
ATOM    491  N   LEU B  14      22.123  -4.940 -27.771  1.00 15.42           N  
ANISOU  491  N   LEU B  14     2847   1564   1450   -313   -562    330       N  
ATOM    492  CA  LEU B  14      22.767  -3.707 -27.325  1.00 17.83           C  
ANISOU  492  CA  LEU B  14     3250   1723   1803   -351   -567    346       C  
ATOM    493  C   LEU B  14      24.024  -3.989 -26.507  1.00 18.30           C  
ANISOU  493  C   LEU B  14     3281   1797   1873   -443   -533    263       C  
ATOM    494  O   LEU B  14      23.990  -4.761 -25.549  1.00 16.56           O  
ANISOU  494  O   LEU B  14     3006   1625   1662   -410   -531    189       O  
ATOM    495  CB  LEU B  14      21.786  -2.873 -26.500  1.00 19.06           C  
ANISOU  495  CB  LEU B  14     3452   1753   2038   -220   -595    312       C  
ATOM    496  CG  LEU B  14      22.267  -1.490 -26.066  1.00 19.79           C  
ANISOU  496  CG  LEU B  14     3672   1640   2207   -247   -611    304       C  
ATOM    497  CD1 LEU B  14      22.272  -0.535 -27.248  1.00 21.72           C  
ANISOU  497  CD1 LEU B  14     4033   1754   2465   -275   -674    466       C  
ATOM    498  CD2 LEU B  14      21.400  -0.958 -24.935  1.00 20.51           C  
ANISOU  498  CD2 LEU B  14     3769   1646   2380   -108   -608    176       C  
ATOM    499  H   LEU B  14      21.695  -5.353 -27.150  1.00 18.47           H  
ATOM    500  HA  LEU B  14      23.025  -3.186 -28.102  1.00 21.52           H  
ATOM    501  HB2 LEU B  14      20.980  -2.746 -27.024  1.00 22.99           H  
ATOM    502  HB3 LEU B  14      21.570  -3.368 -25.694  1.00 22.99           H  
ATOM    503  HG  LEU B  14      23.176  -1.562 -25.736  1.00 23.86           H  
ATOM    504 HD11 LEU B  14      22.580   0.335 -26.949  1.00 26.18           H  
ATOM    505 HD12 LEU B  14      22.868  -0.881 -27.930  1.00 26.18           H  
ATOM    506 HD13 LEU B  14      21.371  -0.464 -27.600  1.00 26.18           H  
ATOM    507 HD21 LEU B  14      21.723  -0.081 -24.676  1.00 24.73           H  
ATOM    508 HD22 LEU B  14      20.482  -0.896 -25.243  1.00 24.73           H  
ATOM    509 HD23 LEU B  14      21.455  -1.567 -24.182  1.00 24.73           H  
HETATM  510  N   ORN B  15      25.128  -3.356 -26.895  1.00 24.44           N  
ANISOU  510  N   ORN B  15     4096   2549   2642   -575   -518    290       N  
HETATM  511  CA  ORN B  15      26.269  -3.510 -26.280  1.00 26.50           C  
ANISOU  511  CA  ORN B  15     4304   2853   2914   -661   -501    215       C  
HETATM  512  CB  ORN B  15      27.320  -4.268 -27.042  1.00 30.05           C  
ANISOU  512  CB  ORN B  15     4609   3449   3358   -634   -495    146       C  
HETATM  513  CG  ORN B  15      28.610  -4.534 -26.315  1.00 33.36           C  
ANISOU  513  CG  ORN B  15     4930   3953   3793   -740   -485     80       C  
HETATM  514  CD  ORN B  15      29.786  -3.911 -27.042  1.00 36.06           C  
ANISOU  514  CD  ORN B  15     5226   4396   4080   -869   -417     95       C  
HETATM  515  NE  ORN B  15      29.731  -4.193 -28.440  1.00 37.58           N  
ANISOU  515  NE  ORN B  15     5245   4736   4298   -927   -397    -13       N  
HETATM  516  C   ORN B  15      26.467  -2.616 -25.281  1.00 23.82           C  
ANISOU  516  C   ORN B  15     4040   2394   2617   -690   -519    173       C  
HETATM  517  O   ORN B  15      26.868  -1.520 -25.490  1.00 25.34           O  
ANISOU  517  O   ORN B  15     4350   2443   2833   -754   -525    223       O  
HETATM  518  H   ORN B  15      25.122  -2.788 -27.603  1.00 29.44           H  
HETATM  519  HA  ORN B  15      26.084  -4.306 -25.749  1.00 31.92           H  
HETATM  520  HB2 ORN B  15      27.503  -3.777 -27.865  1.00 36.17           H  
HETATM  521  HB3 ORN B  15      26.940  -5.133 -27.281  1.00 36.17           H  
HETATM  522  HG2 ORN B  15      28.758  -5.494 -26.252  1.00 40.15           H  
HETATM  523  HG3 ORN B  15      28.555  -4.159 -25.417  1.00 40.15           H  
HETATM  524  HD2 ORN B  15      30.618  -4.264 -26.666  1.00 43.39           H  
HETATM  525  HD3 ORN B  15      29.769  -2.939 -26.915  1.00 43.39           H  
HETATM  526  HE1 ORN B  15      30.524  -3.943 -28.822  1.00 45.21           H  
HETATM  527  HE2 ORN B  15      29.593  -5.091 -28.563  1.00 45.21           H  
HETATM  528  HN3 ORN B  15      29.050  -3.719 -28.828  1.00 45.21           H  
ATOM    529  N   VAL B  16      26.607  -3.061 -23.994  1.00 18.30           N  
ANISOU  529  N   VAL B  16     3296   1733   1922   -659   -539     79       N  
ATOM    530  CA  VAL B  16      26.802  -2.106 -22.906  1.00 20.25           C  
ANISOU  530  CA  VAL B  16     3622   1884   2188   -708   -552     -2       C  
ATOM    531  C   VAL B  16      27.979  -2.509 -22.025  1.00 20.76           C  
ANISOU  531  C   VAL B  16     3599   2067   2221   -804   -586    -73       C  
ATOM    532  O   VAL B  16      27.814  -3.236 -21.045  1.00 20.31           O  
ANISOU  532  O   VAL B  16     3500   2097   2121   -756   -623   -110       O  
ATOM    533  CB  VAL B  16      25.520  -1.970 -22.060  1.00 20.67           C  
ANISOU  533  CB  VAL B  16     3722   1889   2243   -577   -548    -66       C  
ATOM    534  CG1 VAL B  16      25.723  -0.983 -20.915  1.00 22.31           C  
ANISOU  534  CG1 VAL B  16     4009   2011   2458   -633   -548   -201       C  
ATOM    535  CG2 VAL B  16      24.351  -1.532 -22.933  1.00 23.38           C  
ANISOU  535  CG2 VAL B  16     4116   2129   2640   -455   -541     -1       C  
ATOM    536  H   VAL B  16      26.583  -3.882 -23.738  1.00 22.07           H  
ATOM    537  HA  VAL B  16      27.000  -1.235 -23.286  1.00 24.42           H  
ATOM    538  HB  VAL B  16      25.301  -2.834 -21.677  1.00 24.92           H  
ATOM    539 HG11 VAL B  16      24.901  -0.920 -20.403  1.00 26.89           H  
ATOM    540 HG12 VAL B  16      26.443  -1.302 -20.348  1.00 26.89           H  
ATOM    541 HG13 VAL B  16      25.951  -0.115 -21.283  1.00 26.89           H  
ATOM    542 HG21 VAL B  16      23.558  -1.454 -22.381  1.00 28.17           H  
ATOM    543 HG22 VAL B  16      24.562  -0.675 -23.335  1.00 28.17           H  
ATOM    544 HG23 VAL B  16      24.209  -2.197 -23.625  1.00 28.17           H  
TER     545      VAL B  16                                                      
HETATM  546  N   ORN C   1      10.840  -1.717 -25.355  1.00 18.08           N  
ANISOU  546  N   ORN C   1     2080   1855   2932    693    150    687       N  
HETATM  547  CA  ORN C   1      11.337  -2.245 -24.056  1.00 17.61           C  
ANISOU  547  CA  ORN C   1     2087   1789   2817    636    223    622       C  
HETATM  548  CB  ORN C   1      10.176  -2.813 -23.233  1.00 18.64           C  
ANISOU  548  CB  ORN C   1     2138   1863   3081    678    292    657       C  
HETATM  549  CG  ORN C   1       9.223  -1.732 -22.679  1.00 19.28           C  
ANISOU  549  CG  ORN C   1     2243   1830   3253    768    465    737       C  
HETATM  550  CD  ORN C   1       9.421  -1.393 -21.175  1.00 19.57           C  
ANISOU  550  CD  ORN C   1     2444   1766   3226    773    639    695       C  
HETATM  551  NE  ORN C   1       9.567  -2.582 -20.357  1.00 18.96           N  
ANISOU  551  NE  ORN C   1     2329   1728   3147    725    628    647       N  
HETATM  552  C   ORN C   1      12.419  -3.340 -24.256  1.00 16.70           C  
ANISOU  552  C   ORN C   1     1977   1789   2578    587    117    565       C  
HETATM  553  O   ORN C   1      12.608  -3.874 -25.350  1.00 16.55           O  
ANISOU  553  O   ORN C   1     1926   1842   2520    622     -7    575       O  
HETATM  554  H1  ORN C   1      11.586  -1.530 -26.028  1.00 21.12           H  
HETATM  555  H2  ORN C   1      10.198  -2.356 -25.831  1.00 21.12           H  
HETATM  556  H3  ORN C   1      10.327  -0.836 -25.265  1.00 21.12           H  
HETATM  557  HA  ORN C   1      11.821  -1.397 -23.562  1.00 20.57           H  
HETATM  558  HB2 ORN C   1       9.593  -3.516 -23.844  1.00 22.48           H  
HETATM  559  HB3 ORN C   1      10.607  -3.331 -22.365  1.00 22.48           H  
HETATM  560  HG2 ORN C   1       9.375  -0.815 -23.261  1.00 22.62           H  
HETATM  561  HG3 ORN C   1       8.190  -2.067 -22.826  1.00 22.62           H  
HETATM  562  HD2 ORN C   1       8.543  -0.841 -20.827  1.00 22.91           H  
HETATM  563  HD3 ORN C   1      10.322  -0.781 -21.071  1.00 22.91           H  
HETATM  564  HE1 ORN C   1       8.700  -3.031 -20.067  1.00 22.18           H  
ATOM    565  N   CYS C   2      13.148  -3.665 -23.139  1.00 16.25           N  
ANISOU  565  N   CYS C   2     1987   1742   2444    518    176    515       N  
ATOM    566  CA  CYS C   2      14.198  -4.678 -23.175  1.00 16.21           C  
ANISOU  566  CA  CYS C   2     1986   1853   2319    488    109    484       C  
ATOM    567  C   CYS C   2      13.718  -5.980 -22.540  1.00 15.24           C  
ANISOU  567  C   CYS C   2     1827   1723   2239    494     95    436       C  
ATOM    568  O   CYS C   2      12.923  -5.966 -21.599  1.00 15.46           O  
ANISOU  568  O   CYS C   2     1843   1667   2366    484    177    427       O  
ATOM    569  CB  CYS C   2      15.455  -4.170 -22.466  1.00 16.91           C  
ANISOU  569  CB  CYS C   2     2156   1980   2288    387    155    495       C  
ATOM    570  SG  CYS C   2      16.119  -2.638 -23.162  1.00 18.37           S  
ANISOU  570  SG  CYS C   2     2391   2175   2415    341    138    582       S  
ATOM    571  H   CYS C   2      13.035  -3.307 -22.365  1.00 18.93           H  
ATOM    572  HA  CYS C   2      14.428  -4.861 -24.100  1.00 19.56           H  
ATOM    573  HB2 CYS C   2      15.242  -4.004 -21.535  1.00 20.40           H  
ATOM    574  HB3 CYS C   2      16.145  -4.848 -22.530  1.00 20.40           H  
ATOM    575  N   VAL C   3      14.203  -7.103 -23.065  1.00 14.89           N  
ANISOU  575  N   VAL C   3     1786   1764   2108    526     -4    418       N  
ATOM    576  CA  VAL C   3      13.786  -8.428 -22.619  1.00 17.13           C  
ANISOU  576  CA  VAL C   3     2061   2036   2413    527    -52    376       C  
ATOM    577  C   VAL C   3      14.855  -8.993 -21.696  1.00 16.53           C  
ANISOU  577  C   VAL C   3     2028   2029   2225    484      6    334       C  
ATOM    578  O   VAL C   3      16.048  -8.972 -22.025  1.00 16.22           O  
ANISOU  578  O   VAL C   3     2021   2096   2045    500      6    361       O  
ATOM    579  CB  VAL C   3      13.540  -9.368 -23.811  1.00 18.77           C  
ANISOU  579  CB  VAL C   3     2307   2253   2572    597   -218    384       C  
ATOM    580  CG1 VAL C   3      12.994 -10.704 -23.331  1.00 21.13           C  
ANISOU  580  CG1 VAL C   3     2620   2511   2897    573   -297    353       C  
ATOM    581  CG2 VAL C   3      12.582  -8.731 -24.805  1.00 21.99           C  
ANISOU  581  CG2 VAL C   3     2672   2601   3083    622   -294    446       C  
ATOM    582  H   VAL C   3      14.788  -7.122 -23.694  1.00 17.30           H  
ATOM    583  HA  VAL C   3      12.960  -8.352 -22.116  1.00 20.67           H  
ATOM    584  HB  VAL C   3      14.382  -9.532 -24.266  1.00 22.64           H  
ATOM    585 HG11 VAL C   3      12.847 -11.279 -24.098  1.00 25.47           H  
ATOM    586 HG12 VAL C   3      13.638 -11.110 -22.730  1.00 25.47           H  
ATOM    587 HG13 VAL C   3      12.156 -10.552 -22.865  1.00 25.47           H  
ATOM    588 HG21 VAL C   3      12.444  -9.342 -25.545  1.00 26.51           H  
ATOM    589 HG22 VAL C   3      11.739  -8.554 -24.360  1.00 26.51           H  
ATOM    590 HG23 VAL C   3      12.967  -7.902 -25.127  1.00 26.51           H  
ATOM    591  N   PHE C   4      14.429  -9.508 -20.546  1.00 16.36           N  
ANISOU  591  N   PHE C   4     1992   1958   2267    435     57    291       N  
ATOM    592  CA  PHE C   4      15.326 -10.130 -19.584  1.00 15.59           C  
ANISOU  592  CA  PHE C   4     1930   1917   2077    386    106    251       C  
ATOM    593  C   PHE C   4      14.833 -11.533 -19.268  1.00 16.99           C  
ANISOU  593  C   PHE C   4     2101   2079   2277    401     46    206       C  
ATOM    594  O   PHE C   4      13.628 -11.756 -19.112  1.00 14.53           O  
ANISOU  594  O   PHE C   4     1734   1684   2103    396     20    216       O  
ATOM    595  CB  PHE C   4      15.413  -9.312 -18.291  1.00 16.54           C  
ANISOU  595  CB  PHE C   4     2084   1973   2229    296    233    239       C  
ATOM    596  CG  PHE C   4      15.936  -7.918 -18.486  1.00 18.90           C  
ANISOU  596  CG  PHE C   4     2436   2259   2486    252    267    289       C  
ATOM    597  CD1 PHE C   4      15.076  -6.877 -18.790  1.00 19.35           C  
ANISOU  597  CD1 PHE C   4     2504   2213   2634    285    304    313       C  
ATOM    598  CD2 PHE C   4      17.287  -7.648 -18.357  1.00 20.00           C  
ANISOU  598  CD2 PHE C   4     2613   2491   2495    171    254    338       C  
ATOM    599  CE1 PHE C   4      15.554  -5.593 -18.966  1.00 19.86           C  
ANISOU  599  CE1 PHE C   4     2649   2249   2649    237    322    358       C  
ATOM    600  CE2 PHE C   4      17.770  -6.367 -18.531  1.00 20.93           C  
ANISOU  600  CE2 PHE C   4     2790   2590   2574    100    253    407       C  
ATOM    601  CZ  PHE C   4      16.901  -5.338 -18.836  1.00 21.07           C  
ANISOU  601  CZ  PHE C   4     2850   2483   2671    132    284    403       C  
ATOM    602  H   PHE C   4      13.606  -9.507 -20.297  1.00 19.75           H  
ATOM    603  HA  PHE C   4      16.215 -10.195 -19.966  1.00 18.83           H  
ATOM    604  HB2 PHE C   4      14.526  -9.245 -17.905  1.00 19.97           H  
ATOM    605  HB3 PHE C   4      16.006  -9.767 -17.673  1.00 19.97           H  
ATOM    606  HD1 PHE C   4      14.165  -7.044 -18.878  1.00 23.33           H  
ATOM    607  HD2 PHE C   4      17.876  -8.337 -18.152  1.00 24.12           H  
ATOM    608  HE1 PHE C   4      14.967  -4.901 -19.171  1.00 23.95           H  
ATOM    609  HE2 PHE C   4      18.681  -6.197 -18.444  1.00 25.23           H  
ATOM    610  HZ  PHE C   4      17.225  -4.474 -18.955  1.00 25.39           H  
ATOM    611  N   PHE C   5      15.769 -12.477 -19.179  1.00 12.76           N  
ANISOU  611  N   PHE C   5     1616   1627   1603    420     24    182       N  
ATOM    612  CA  PHE C   5      15.464 -13.839 -18.745  1.00 12.61           C  
ANISOU  612  CA  PHE C   5     1624   1589   1579    423    -31    132       C  
ATOM    613  C   PHE C   5      15.625 -13.880 -17.232  1.00 12.11           C  
ANISOU  613  C   PHE C   5     1530   1517   1553    335     85     94       C  
ATOM    614  O   PHE C   5      16.744 -13.904 -16.716  1.00 11.72           O  
ANISOU  614  O   PHE C   5     1506   1550   1395    307    146     94       O  
ATOM    615  CB  PHE C   5      16.374 -14.852 -19.432  1.00 13.47           C  
ANISOU  615  CB  PHE C   5     1841   1779   1496    523    -99    131       C  
ATOM    616  CG  PHE C   5      16.160 -14.964 -20.921  1.00 19.97           C  
ANISOU  616  CG  PHE C   5     2755   2581   2252    630   -224    162       C  
ATOM    617  CD1 PHE C   5      15.069 -14.368 -21.537  1.00 22.05           C  
ANISOU  617  CD1 PHE C   5     2977   2752   2647    603   -302    186       C  
ATOM    618  CD2 PHE C   5      17.054 -15.676 -21.704  1.00 23.82           C  
ANISOU  618  CD2 PHE C   5     3385   3135   2530    774   -256    183       C  
ATOM    619  CE1 PHE C   5      14.881 -14.477 -22.902  1.00 24.49           C  
ANISOU  619  CE1 PHE C   5     3393   3029   2884    690   -433    216       C  
ATOM    620  CE2 PHE C   5      16.868 -15.789 -23.069  1.00 25.28           C  
ANISOU  620  CE2 PHE C   5     3705   3277   2624    889   -369    209       C  
ATOM    621  CZ  PHE C   5      15.781 -15.188 -23.668  1.00 25.86           C  
ANISOU  621  CZ  PHE C   5     3742   3249   2833    833   -469    218       C  
ATOM    622  H   PHE C   5      16.598 -12.351 -19.366  1.00 14.74           H  
ATOM    623  HA  PHE C   5      14.543 -14.052 -18.965  1.00 14.57           H  
ATOM    624  HB2 PHE C   5      17.297 -14.591 -19.285  1.00 16.27           H  
ATOM    625  HB3 PHE C   5      16.216 -15.727 -19.045  1.00 16.27           H  
ATOM    626  HD1 PHE C   5      14.459 -13.887 -21.026  1.00 26.57           H  
ATOM    627  HD2 PHE C   5      17.790 -16.083 -21.306  1.00 28.70           H  
ATOM    628  HE1 PHE C   5      14.146 -14.072 -23.304  1.00 29.50           H  
ATOM    629  HE2 PHE C   5      17.477 -16.268 -23.584  1.00 30.45           H  
ATOM    630  HZ  PHE C   5      15.654 -15.263 -24.586  1.00 31.14           H  
ATOM    631  N   CYS C   6      14.504 -13.896 -16.517  1.00 12.30           N  
ANISOU  631  N   CYS C   6     1498   1446   1729    296    115     86       N  
ATOM    632  CA  CYS C   6      14.509 -13.807 -15.065  1.00 12.03           C  
ANISOU  632  CA  CYS C   6     1460   1378   1732    232    241     54       C  
ATOM    633  C   CYS C   6      13.713 -14.953 -14.464  1.00 12.08           C  
ANISOU  633  C   CYS C   6     1420   1349   1820    221    208     39       C  
ATOM    634  O   CYS C   6      12.694 -15.379 -15.017  1.00 12.68           O  
ANISOU  634  O   CYS C   6     1435   1387   1997    239    104     91       O  
ATOM    635  CB  CYS C   6      13.928 -12.471 -14.594  1.00 12.55           C  
ANISOU  635  CB  CYS C   6     1525   1354   1891    224    364     88       C  
ATOM    636  SG  CYS C   6      14.748 -11.030 -15.314  1.00 13.11           S  
ANISOU  636  SG  CYS C   6     1664   1443   1876    213    377    121       S  
ATOM    637  H   CYS C   6      13.716 -13.958 -16.857  1.00 14.19           H  
ATOM    638  HA  CYS C   6      15.422 -13.871 -14.744  1.00 13.86           H  
ATOM    639  HB2 CYS C   6      12.990 -12.433 -14.839  1.00 14.49           H  
ATOM    640  HB3 CYS C   6      14.018 -12.413 -13.630  1.00 14.49           H  
ATOM    641  N   GLU C   7      14.189 -15.446 -13.325  1.00 11.57           N  
ANISOU  641  N   GLU C   7     1384   1298   1713    175    281    -13       N  
ATOM    642  CA  GLU C   7      13.456 -16.463 -12.590  1.00 11.64           C  
ANISOU  642  CA  GLU C   7     1344   1274   1805    156    267    -20       C  
ATOM    643  C   GLU C   7      12.131 -15.896 -12.098  1.00 15.63           C  
ANISOU  643  C   GLU C   7     1751   1695   2490    175    353     62       C  
ATOM    644  O   GLU C   7      12.058 -14.760 -11.622  1.00 13.48           O  
ANISOU  644  O   GLU C   7     1510   1372   2238    199    499     78       O  
ATOM    645  CB  GLU C   7      14.289 -16.966 -11.413  1.00 13.99           C  
ANISOU  645  CB  GLU C   7     1695   1603   2016    107    347    -90       C  
ATOM    646  CG  GLU C   7      13.651 -18.102 -10.639  1.00 16.51           C  
ANISOU  646  CG  GLU C   7     1969   1898   2406     85    329   -101       C  
ATOM    647  CD  GLU C   7      14.594 -18.697  -9.612  1.00 19.15           C  
ANISOU  647  CD  GLU C   7     2365   2275   2636     38    390   -176       C  
ATOM    648  OE1 GLU C   7      15.596 -18.035  -9.267  1.00 20.70           O  
ANISOU  648  OE1 GLU C   7     2627   2505   2733      5    466   -197       O  
ATOM    649  OE2 GLU C   7      14.337 -19.829  -9.154  1.00 19.47           O1-
ANISOU  649  OE2 GLU C   7     2389   2316   2694     22    346   -198       O1-
ATOM    650  H   GLU C   7      14.931 -15.208 -12.961  1.00 13.31           H  
ATOM    651  HA  GLU C   7      13.269 -17.213 -13.177  1.00 13.53           H  
ATOM    652  HB2 GLU C   7      15.143 -17.282 -11.749  1.00 16.90           H  
ATOM    653  HB3 GLU C   7      14.432 -16.232 -10.796  1.00 16.90           H  
ATOM    654  HG2 GLU C   7      12.869 -17.768 -10.172  1.00 19.93           H  
ATOM    655  HG3 GLU C   7      13.396 -18.804 -11.257  1.00 19.93           H  
ATOM    656  N   ASP C   8      11.078 -16.691 -12.233  1.00 21.18           N  
ANISOU  656  N   ASP C   8     2349   2381   3316    170    257    139       N  
ATOM    657  CA  ASP C   8       9.763 -16.305 -11.746  1.00 24.43           C  
ANISOU  657  CA  ASP C   8     2624   2745   3913    207    346    275       C  
ATOM    658  C   ASP C   8       8.992 -17.572 -11.413  1.00 24.07           C  
ANISOU  658  C   ASP C   8     2471   2708   3968    155    238    352       C  
ATOM    659  O   ASP C   8       8.167 -18.040 -12.196  1.00 22.41           O  
ANISOU  659  O   ASP C   8     2166   2495   3853    117     57    473       O  
ATOM    660  CB  ASP C   8       9.020 -15.461 -12.782  1.00 25.38           C  
ANISOU  660  CB  ASP C   8     2666   2850   4129    254    305    391       C  
ATOM    661  CG  ASP C   8       7.864 -14.689 -12.179  1.00 29.36           C  
ANISOU  661  CG  ASP C   8     3046   3315   4795    342    479    551       C  
ATOM    662  OD1 ASP C   8       7.140 -15.265 -11.341  1.00 28.44           O1-
ANISOU  662  OD1 ASP C   8     2820   3203   4785    351    531    649       O1-
ATOM    663  OD2 ASP C   8       7.687 -13.504 -12.535  1.00 32.48           O  
ANISOU  663  OD2 ASP C   8     3457   3679   5206    419    574    594       O  
ATOM    664  H   ASP C   8      11.100 -17.465 -12.607  1.00 25.53           H  
ATOM    665  HA  ASP C   8       9.859 -15.782 -10.935  1.00 29.43           H  
ATOM    666  HB2 ASP C   8       9.637 -14.822 -13.172  1.00 30.57           H  
ATOM    667  HB3 ASP C   8       8.666 -16.044 -13.471  1.00 30.57           H  
HETATM  668  N   ORN C   9      12.807 -22.178  -9.837  1.00 12.82           N  
ANISOU  668  N   ORN C   9     1501   1416   1954     -3     27   -138       N  
HETATM  669  CA  ORN C   9      11.552 -21.925 -10.595  1.00 12.63           C  
ANISOU  669  CA  ORN C   9     1384   1336   2080    -15    -88    -14       C  
HETATM  670  CB  ORN C   9      10.793 -20.726  -9.981  1.00 16.09           C  
ANISOU  670  CB  ORN C   9     1675   1756   2682      9     92     74       C  
HETATM  671  CG  ORN C   9       9.322 -20.570 -10.435  1.00 19.13           C  
ANISOU  671  CG  ORN C   9     1897   2107   3265     -2      7    261       C  
HETATM  672  CD  ORN C   9       8.659 -19.367  -9.764  1.00 21.30           C  
ANISOU  672  CD  ORN C   9     2054   2369   3672     77    235    360       C  
HETATM  673  NE  ORN C   9       9.297 -18.148 -10.201  1.00 21.06           N  
ANISOU  673  NE  ORN C   9     2116   2329   3556    136    333    290       N  
HETATM  674  C   ORN C   9      11.905 -21.665 -12.083  1.00 12.42           C  
ANISOU  674  C   ORN C   9     1460   1309   1948     32   -217    -19       C  
HETATM  675  O   ORN C   9      13.070 -21.502 -12.447  1.00 11.73           O  
ANISOU  675  O   ORN C   9     1488   1277   1693     91   -176    -99       O  
HETATM  676  H2  ORN C   9      13.345 -21.328  -9.653  1.00 15.50           H  
HETATM  677  H   ORN C   9      13.452 -22.807 -10.321  1.00 15.50           H  
HETATM  678  H3  ORN C   9      12.648 -22.603  -8.920  1.00 15.50           H  
HETATM  679  HA  ORN C   9      10.982 -22.857 -10.542  1.00 15.28           H  
HETATM  680  HB2 ORN C   9      10.779 -20.855  -8.890  1.00 19.42           H  
HETATM  681  HB3 ORN C   9      11.326 -19.801 -10.242  1.00 19.42           H  
HETATM  682  HG2 ORN C   9       9.297 -20.436 -11.522  1.00 23.07           H  
HETATM  683  HG3 ORN C   9       8.766 -21.478 -10.173  1.00 23.07           H  
HETATM  684  HD2 ORN C   9       8.779 -19.457  -8.680  1.00 25.68           H  
HETATM  685  HD3 ORN C   9       7.601 -19.341 -10.039  1.00 25.68           H  
HETATM  686  HE1 ORN C   9       9.990 -17.757  -9.566  1.00 25.38           H  
ATOM    687  N   ALA C  10      10.853 -21.646 -12.964  1.00 13.59           N  
ANISOU  687  N   ALA C  10     1562   1401   2203      3   -383     95       N  
ATOM    688  CA  ALA C  10      11.061 -21.412 -14.387  1.00 14.00           C  
ANISOU  688  CA  ALA C  10     1727   1433   2158     48   -517     98       C  
ATOM    689  C   ALA C  10      11.706 -20.049 -14.627  1.00 13.34           C  
ANISOU  689  C   ALA C  10     1618   1407   2045    123   -347     66       C  
ATOM    690  O   ALA C  10      11.487 -19.104 -13.870  1.00 13.12           O  
ANISOU  690  O   ALA C  10     1467   1391   2126    122   -169     89       O  
ATOM    691  CB  ALA C  10       9.741 -21.512 -15.135  1.00 29.98           C  
ANISOU  691  CB  ALA C  10     3682   3384   4325    -24   -725    251       C  
ATOM    692  H   ALA C  10      10.030 -21.758 -12.742  1.00 15.74           H  
ATOM    693  HA  ALA C  10      11.657 -22.093 -14.736  1.00 16.22           H  
ATOM    694  HB1 ALA C  10       9.900 -21.354 -16.079  1.00 36.09           H  
ATOM    695  HB2 ALA C  10       9.372 -22.400 -15.006  1.00 36.09           H  
ATOM    696  HB3 ALA C  10       9.129 -20.845 -14.786  1.00 36.09           H  
ATOM    697  N   ILE C  11      12.513 -19.961 -15.680  1.00 14.23           N  
ANISOU  697  N   ILE C  11     1871   1543   1993    197   -404     24       N  
ATOM    698  CA  ILE C  11      13.108 -18.705 -16.122  1.00 14.63           C  
ANISOU  698  CA  ILE C  11     1901   1647   2009    256   -288     21       C  
ATOM    699  C   ILE C  11      12.259 -18.174 -17.268  1.00 18.24           C  
ANISOU  699  C   ILE C  11     2334   2050   2547    264   -409    104       C  
ATOM    700  O   ILE C  11      12.078 -18.856 -18.283  1.00 20.29           O  
ANISOU  700  O   ILE C  11     2723   2259   2726    282   -605    120       O  
ATOM    701  CB  ILE C  11      14.571 -18.895 -16.552  1.00 16.91           C  
ANISOU  701  CB  ILE C  11     2327   2026   2073    347   -254    -34       C  
ATOM    702  CG1 ILE C  11      15.410 -19.352 -15.356  1.00 16.31           C  
ANISOU  702  CG1 ILE C  11     2248   2017   1934    324   -132    -88       C  
ATOM    703  CG2 ILE C  11      15.134 -17.594 -17.136  1.00 18.04           C  
ANISOU  703  CG2 ILE C  11     2436   2228   2190    390   -169      0       C  
ATOM    704  CD1 ILE C  11      16.812 -19.805 -15.711  1.00 14.86           C  
ANISOU  704  CD1 ILE C  11     2175   1941   1528    427   -102    -94       C  
ATOM    705  H   ILE C  11      12.736 -20.634 -16.167  1.00 17.19           H  
ATOM    706  HA  ILE C  11      13.082 -18.062 -15.397  1.00 17.67           H  
ATOM    707  HB  ILE C  11      14.607 -19.582 -17.235  1.00 20.41           H  
ATOM    708 HG12 ILE C  11      15.488 -18.614 -14.731  1.00 19.69           H  
ATOM    709 HG13 ILE C  11      14.960 -20.097 -14.927  1.00 19.69           H  
ATOM    710 HG21 ILE C  11      16.057 -17.740 -17.398  1.00 21.76           H  
ATOM    711 HG22 ILE C  11      14.606 -17.341 -17.909  1.00 21.76           H  
ATOM    712 HG23 ILE C  11      15.088 -16.899 -16.461  1.00 21.76           H  
ATOM    713 HD11 ILE C  11      17.270 -20.076 -14.900  1.00 17.94           H  
ATOM    714 HD12 ILE C  11      16.755 -20.553 -16.325  1.00 17.94           H  
ATOM    715 HD13 ILE C  11      17.284 -19.068 -16.129  1.00 17.94           H  
ATOM    716  N   ILE C  12      11.746 -16.958 -17.110  1.00 18.15           N  
ANISOU  716  N   ILE C  12     2185   2034   2676    256   -298    161       N  
ATOM    717  CA  ILE C  12      10.754 -16.411 -18.028  1.00 20.70           C  
ANISOU  717  CA  ILE C  12     2440   2310   3117    254   -398    267       C  
ATOM    718  C   ILE C  12      11.261 -15.090 -18.611  1.00 20.75           C  
ANISOU  718  C   ILE C  12     2450   2349   3087    316   -298    258       C  
ATOM    719  O   ILE C  12      11.962 -14.342 -17.931  1.00 19.85           O  
ANISOU  719  O   ILE C  12     2333   2271   2937    327   -123    211       O  
ATOM    720  CB  ILE C  12       9.398 -16.222 -17.301  1.00 21.41           C  
ANISOU  720  CB  ILE C  12     2335   2362   3437    204   -356    397       C  
ATOM    721  CG1 ILE C  12       8.972 -17.521 -16.605  1.00 23.34           C  
ANISOU  721  CG1 ILE C  12     2560   2588   3721    128   -449    421       C  
ATOM    722  CG2 ILE C  12       8.304 -15.757 -18.257  1.00 23.62           C  
ANISOU  722  CG2 ILE C  12     2515   2608   3854    193   -477    552       C  
ATOM    723  CD1 ILE C  12       8.814 -18.718 -17.534  1.00 26.06           C  
ANISOU  723  CD1 ILE C  12     3040   2879   3985     67   -742    436       C  
ATOM    724  H   ILE C  12      11.959 -16.424 -16.470  1.00 21.89           H  
ATOM    725  HA  ILE C  12      10.621 -17.033 -18.760  1.00 24.96           H  
ATOM    726  HB  ILE C  12       9.514 -15.540 -16.621  1.00 25.80           H  
ATOM    727 HG12 ILE C  12       9.642 -17.751 -15.942  1.00 28.13           H  
ATOM    728 HG13 ILE C  12       8.119 -17.373 -16.168  1.00 28.13           H  
ATOM    729 HG21 ILE C  12       7.476 -15.652 -17.762  1.00 28.46           H  
ATOM    730 HG22 ILE C  12       8.566 -14.908 -18.647  1.00 28.46           H  
ATOM    731 HG23 ILE C  12       8.191 -16.421 -18.954  1.00 28.46           H  
ATOM    732 HD11 ILE C  12       8.544 -19.490 -17.012  1.00 31.39           H  
ATOM    733 HD12 ILE C  12       8.136 -18.514 -18.198  1.00 31.39           H  
ATOM    734 HD13 ILE C  12       9.662 -18.893 -17.971  1.00 31.39           H  
HETATM  735  N   EZY C  13      10.920 -14.790 -19.862  1.00 21.61           N  
ANISOU  735  N   EZY C  13     2581   2433   3197    343   -424    312       N  
HETATM  736  CA  EZY C  13      11.282 -13.483 -20.403  1.00 21.25           C  
ANISOU  736  CA  EZY C  13     2522   2415   3138    395   -332    320       C  
HETATM  737  C   EZY C  13      10.464 -12.504 -20.054  1.00 22.55           C  
ANISOU  737  C   EZY C  13     2557   2547   3463    389   -228    395       C  
HETATM  738  O   EZY C  13       9.300 -12.596 -20.251  1.00 25.03           O  
ANISOU  738  O   EZY C  13     2765   2819   3925    368   -304    507       O  
HETATM  739  C01 EZY C  13      10.190 -15.567 -20.866  1.00 26.18           C  
ANISOU  739  C01 EZY C  13     3219   2946   3782    314   -674    378       C  
HETATM  740  C02 EZY C  13      10.950 -16.196 -23.211  1.00 30.41           C  
ANISOU  740  C02 EZY C  13     4118   3429   4009    427   -962    338       C  
HETATM  741  C03 EZY C  13      11.831 -16.838 -24.067  1.00 32.15           C  
ANISOU  741  C03 EZY C  13     4598   3639   3981    539  -1042    278       C  
HETATM  742  C04 EZY C  13      12.905 -17.549 -23.555  1.00 31.46           C  
ANISOU  742  C04 EZY C  13     4622   3609   3722    617   -949    197       C  
HETATM  743  C05 EZY C  13      13.101 -17.618 -22.185  1.00 27.67           C  
ANISOU  743  C05 EZY C  13     3996   3193   3326    555   -797    161       C  
HETATM  744  C06 EZY C  13      12.223 -16.976 -21.330  1.00 26.23           C  
ANISOU  744  C06 EZY C  13     3582   3004   3381    439   -724    203       C  
HETATM  745  C07 EZY C  13      11.149 -16.262 -21.838  1.00 27.50           C  
ANISOU  745  C07 EZY C  13     3629   3113   3707    389   -794    299       C  
HETATM  746  N01 EZY C  13       9.829 -15.457 -23.766  1.00 31.55           N  
ANISOU  746  N01 EZY C  13     4131   3528   4331    369  -1043    458       N  
HETATM  747  O01 EZY C  13       8.735 -15.679 -23.401  1.00 31.85           O  
ANISOU  747  O01 EZY C  13     4036   3523   4541    265  -1125    565       O  
HETATM  748  O02 EZY C  13      10.016 -14.638 -24.586  1.00 33.66           O  
ANISOU  748  O02 EZY C  13     4409   3810   4570    430  -1025    469       O  
HETATM  749  HA2 EZY C  13      12.206 -13.229 -20.554  1.00 25.62           H  
HETATM  750  HA3 EZY C  13      11.065 -13.678 -21.329  1.00 25.62           H  
HETATM  751  H08 EZY C  13       9.651 -16.237 -20.418  1.00 31.53           H  
HETATM  752  H05 EZY C  13       9.608 -14.973 -21.365  1.00 31.53           H  
HETATM  753  H14 EZY C  13      11.700 -16.793 -24.987  1.00 38.70           H  
HETATM  754  H10 EZY C  13      13.495 -17.979 -24.132  1.00 37.86           H  
HETATM  755  H11 EZY C  13      13.822 -18.093 -21.841  1.00 33.32           H  
HETATM  756  H12 EZY C  13      12.355 -17.022 -20.410  1.00 31.60           H  
ATOM    757  N   LEU C  14      11.024 -11.450 -19.466  1.00 27.23           N  
ANISOU  757  N   LEU C  14     3160   3153   4032    408    -45    360       N  
ATOM    758  CA  LEU C  14      10.251 -10.279 -19.065  1.00 29.08           C  
ANISOU  758  CA  LEU C  14     3319   3332   4397    439     97    435       C  
ATOM    759  C   LEU C  14      10.623  -9.080 -19.928  1.00 27.11           C  
ANISOU  759  C   LEU C  14     3113   3084   4102    475    115    442       C  
ATOM    760  O   LEU C  14      11.803  -8.848 -20.189  1.00 23.25           O  
ANISOU  760  O   LEU C  14     2720   2646   3468    460    112    376       O  
ATOM    761  CB  LEU C  14      10.494  -9.940 -17.592  1.00 30.08           C  
ANISOU  761  CB  LEU C  14     3492   3424   4513    432    291    394       C  
ATOM    762  CG  LEU C  14      10.169 -11.000 -16.539  1.00 32.35           C  
ANISOU  762  CG  LEU C  14     3738   3709   4845    404    313    386       C  
ATOM    763  CD1 LEU C  14      10.453 -10.442 -15.154  1.00 33.41           C  
ANISOU  763  CD1 LEU C  14     3964   3787   4944    412    514    344       C  
ATOM    764  CD2 LEU C  14       8.723 -11.466 -16.643  1.00 32.52           C  
ANISOU  764  CD2 LEU C  14     3589   3714   5053    424    259    534       C  
ATOM    765  H   LEU C  14      11.863 -11.390 -19.285  1.00 32.78           H  
ATOM    766  HA  LEU C  14       9.306 -10.461 -19.185  1.00 35.01           H  
ATOM    767  HB2 LEU C  14      11.433  -9.721 -17.489  1.00 36.21           H  
ATOM    768  HB3 LEU C  14       9.963  -9.158 -17.376  1.00 36.21           H  
ATOM    769  HG  LEU C  14      10.743 -11.770 -16.677  1.00 38.94           H  
ATOM    770 HD11 LEU C  14      10.245 -11.120 -14.493  1.00 40.21           H  
ATOM    771 HD12 LEU C  14      11.391 -10.201 -15.098  1.00 40.21           H  
ATOM    772 HD13 LEU C  14       9.900  -9.658 -15.011  1.00 40.21           H  
ATOM    773 HD21 LEU C  14       8.557 -12.135 -15.961  1.00 39.14           H  
ATOM    774 HD22 LEU C  14       8.136 -10.704 -16.510  1.00 39.14           H  
ATOM    775 HD23 LEU C  14       8.577 -11.846 -17.524  1.00 39.14           H  
HETATM  776  N   ORN C  15       9.618  -8.318 -20.357  1.00 20.58           N  
ANISOU  776  N   ORN C  15     2202   2213   3406    523    136    547       N  
HETATM  777  CA  ORN C  15       9.846  -7.242 -21.061  1.00 20.35           C  
ANISOU  777  CA  ORN C  15     2210   2176   3348    555    157    558       C  
HETATM  778  CB  ORN C  15       9.093  -7.278 -22.371  1.00 21.89           C  
ANISOU  778  CB  ORN C  15     2317   2377   3622    578      5    649       C  
HETATM  779  CG  ORN C  15       7.598  -7.179 -22.160  1.00 25.93           C  
ANISOU  779  CG  ORN C  15     2665   2849   4337    609     34    811       C  
HETATM  780  CD  ORN C  15       6.887  -7.324 -23.490  1.00 26.59           C  
ANISOU  780  CD  ORN C  15     2666   2940   4496    595   -164    920       C  
HETATM  781  NE  ORN C  15       7.128  -6.174 -24.304  1.00 24.82           N  
ANISOU  781  NE  ORN C  15     2481   2710   4239    647   -131    916       N  
HETATM  782  C   ORN C  15       9.656  -6.136 -20.316  1.00 19.45           C  
ANISOU  782  C   ORN C  15     2139   1991   3259    596    340    580       C  
HETATM  783  O   ORN C  15       8.606  -5.942 -19.733  1.00 18.26           O  
ANISOU  783  O   ORN C  15     1916   1787   3234    660    448    674       O  
HETATM  784  H   ORN C  15       8.747  -8.524 -20.173  1.00 24.81           H  
HETATM  785  HA  ORN C  15      10.769  -7.249 -21.393  1.00 24.54           H  
HETATM  786  HB2 ORN C  15       9.293  -8.119 -22.829  1.00 26.38           H  
HETATM  787  HB3 ORN C  15       9.388  -6.532 -22.930  1.00 26.38           H  
HETATM  788  HG2 ORN C  15       7.380  -6.311 -21.766  1.00 31.23           H  
HETATM  789  HG3 ORN C  15       7.309  -7.893 -21.557  1.00 31.23           H  
HETATM  790  HD2 ORN C  15       5.923  -7.412 -23.333  1.00 32.02           H  
HETATM  791  HD3 ORN C  15       7.215  -8.125 -23.950  1.00 32.02           H  
HETATM  792  HE1 ORN C  15       8.030  -6.083 -24.446  1.00 29.89           H  
HETATM  793  HE2 ORN C  15       6.700  -6.275 -25.111  1.00 29.89           H  
HETATM  794  HN3 ORN C  15       6.808  -5.426 -23.880  1.00 29.89           H  
ATOM    795  N   VAL C  16      10.812  -5.477 -20.003  1.00 16.77           N  
ANISOU  795  N   VAL C  16     1953   1644   2774    554    397    497       N  
ATOM    796  CA  VAL C  16      10.820  -4.308 -19.133  1.00 17.39           C  
ANISOU  796  CA  VAL C  16     2173   1611   2822    576    566    499       C  
ATOM    797  C   VAL C  16      10.808  -3.053 -19.990  1.00 17.93           C  
ANISOU  797  C   VAL C  16     2289   1644   2879    609    567    542       C  
ATOM    798  O   VAL C  16      11.860  -2.518 -20.341  1.00 17.57           O  
ANISOU  798  O   VAL C  16     2341   1621   2712    534    513    507       O  
ATOM    799  CB  VAL C  16      12.036  -4.315 -18.188  1.00 20.58           C  
ANISOU  799  CB  VAL C  16     2742   2005   3072    470    592    412       C  
ATOM    800  CG1 VAL C  16      12.001  -3.113 -17.254  1.00 22.57           C  
ANISOU  800  CG1 VAL C  16     3217   2097   3263    482    739    415       C  
ATOM    801  CG2 VAL C  16      12.083  -5.608 -17.386  1.00 21.21           C  
ANISOU  801  CG2 VAL C  16     2769   2129   3161    439    587    366       C  
ATOM    802  H   VAL C  16      11.576  -5.656 -20.356  1.00 19.55           H  
ATOM    803  HA  VAL C  16      10.016  -4.311 -18.590  1.00 20.29           H  
ATOM    804  HB  VAL C  16      12.847  -4.261 -18.716  1.00 24.81           H  
ATOM    805 HG11 VAL C  16      12.776  -3.143 -16.671  1.00 27.20           H  
ATOM    806 HG12 VAL C  16      12.016  -2.301 -17.784  1.00 27.20           H  
ATOM    807 HG13 VAL C  16      11.188  -3.148 -16.725  1.00 27.20           H  
ATOM    808 HG21 VAL C  16      12.855  -5.587 -16.800  1.00 25.56           H  
ATOM    809 HG22 VAL C  16      11.271  -5.682 -16.860  1.00 25.56           H  
ATOM    810 HG23 VAL C  16      12.151  -6.357 -17.998  1.00 25.56           H  
TER     811      VAL C  16                                                      
HETATM  812  I   IOD A 101      18.173 -17.125 -12.882  1.00 30.73           I  
HETATM  813  I   IOD A 102      19.659 -19.659 -12.685  0.50 56.53           I  
HETATM  814  I   IOD A 103      19.947 -16.950  -7.365  0.58 25.17           I  
HETATM  815  I   IOD A 104      33.031 -22.850 -21.005  0.75 54.77           I  
HETATM  816  I   IOD B 101      30.201  -8.026 -25.080  1.00114.49           I  
HETATM  817  I   IOD B 102      30.590  11.828 -23.218  0.47 36.01           I  
HETATM  818  I   IOD B 103      20.171  -5.768 -35.521  1.00 30.97           I  
HETATM  819  I   IOD B 104      29.210  -0.526 -28.819  0.47 48.78           I  
HETATM  820  I   IOD B 105      35.061  10.303 -22.848  0.85109.36           I  
HETATM  821  C1  MPD B 106      27.782  -7.733 -28.945  1.00 70.75           C  
HETATM  822  C2  MPD B 106      27.464  -8.915 -29.861  1.00 70.71           C  
HETATM  823  O2  MPD B 106      26.532  -8.427 -30.862  1.00 71.26           O  
HETATM  824  CM  MPD B 106      28.689  -9.435 -30.607  1.00 72.08           C  
HETATM  825  C3  MPD B 106      26.826 -10.044 -29.050  1.00 68.90           C  
HETATM  826  C4  MPD B 106      26.119 -11.077 -29.928  1.00 66.53           C  
HETATM  827  O4  MPD B 106      26.571 -12.365 -29.569  1.00 64.75           O  
HETATM  828  C5  MPD B 106      24.595 -11.032 -29.822  1.00 66.36           C  
HETATM  829  H11 MPD B 106      27.479  -7.972 -27.925  1.00 85.01           H  
HETATM  830  H12 MPD B 106      27.240  -6.851 -29.287  1.00 85.01           H  
HETATM  831  H13 MPD B 106      28.853  -7.533 -28.968  1.00 85.01           H  
HETATM  832  HO2 MPD B 106      25.694  -8.931 -30.801  1.00 85.63           H  
HETATM  833  HM1 MPD B 106      28.825 -10.494 -30.387  1.00 86.61           H  
HETATM  834  HM2 MPD B 106      29.571  -8.881 -30.286  1.00 86.61           H  
HETATM  835  HM3 MPD B 106      28.545  -9.301 -31.679  1.00 86.61           H  
HETATM  836  H31 MPD B 106      27.599 -10.543 -28.465  1.00 82.80           H  
HETATM  837  H32 MPD B 106      26.107  -9.619 -28.350  1.00 82.80           H  
HETATM  838  H4  MPD B 106      26.390 -10.880 -30.965  1.00 79.95           H  
HETATM  839  HO4 MPD B 106      27.227 -12.676 -30.227  1.00 77.82           H  
HETATM  840  H51 MPD B 106      24.225 -12.004 -29.495  1.00 79.74           H  
HETATM  841  H52 MPD B 106      24.170 -10.790 -30.796  1.00 79.74           H  
HETATM  842  H53 MPD B 106      24.304 -10.270 -29.099  1.00 79.74           H  
HETATM  843  I   IOD C 101      11.747 -18.239  -6.866  0.39 28.89           I  
HETATM  844  O   HOH A 201      18.680 -11.902 -20.176  1.00 18.63           O  
HETATM  845  O   HOH A 202      20.922 -20.187  -9.472  1.00 25.08           O  
HETATM  846  O   HOH A 203      33.345  -9.274 -25.526  1.00  9.64           O  
HETATM  847  O   HOH A 204      36.389 -10.376 -17.800  1.00 23.73           O  
HETATM  848  O   HOH A 205      37.977 -11.728 -15.398  1.00 46.09           O  
HETATM  849  O   HOH A 206      19.189 -13.963  -5.342  1.00 32.31           O  
HETATM  850  O   HOH B 201      22.381  -9.252 -20.738  1.00 22.55           O  
HETATM  851  O   HOH B 202      25.881   0.740 -26.140  1.00 32.61           O  
HETATM  852  O   HOH B 203      27.489  -7.604 -33.163  1.00 40.53           O  
HETATM  853  O   HOH B 204      33.142  -6.929 -23.269  1.00 28.25           O  
HETATM  854  O   HOH B 205       9.961  -7.001 -26.699  1.00 24.14           O  
HETATM  855  O   HOH B 206      17.193   1.401 -33.147  1.00 31.17           O  
HETATM  856  O   HOH C 201       7.054 -12.842 -21.107  1.00 44.20           O  
HETATM  857  O   HOH C 202      17.290 -16.156  -9.810  1.00 16.34           O  
HETATM  858  O   HOH C 203      13.679 -13.016 -10.421  1.00 14.83           O  
HETATM  859  O   HOH C 204      12.956 -24.599 -10.978  1.00  4.31           O  
HETATM  860  O   HOH C 205      18.027  -7.011 -22.344  1.00 18.24           O  
HETATM  861  O   HOH C 206       5.765 -15.863  -8.803  1.00 78.26           O  
HETATM  862  O   HOH C 207      17.758 -11.756 -22.269  1.00 20.04           O  
HETATM  863  O   HOH C 208       8.256 -16.027  -7.850  1.00110.17           O  
HETATM  864  O   HOH C 209      19.574  -9.828 -20.892  1.00 36.72           O  
CONECT    1    2   10                                                           
CONECT    2    1    3    7   12                                                 
CONECT    3    2    4   13   14                                                 
CONECT    4    3    5   15   16                                                 
CONECT    5    4    6   17   18                                                 
CONECT    6    5   19  266                                                      
CONECT    7    2    8   20                                                      
CONECT    8    7                                                                
CONECT   10    1                                                                
CONECT   12    2                                                                
CONECT   13    3                                                                
CONECT   14    3                                                                
CONECT   15    4                                                                
CONECT   16    4                                                                
CONECT   17    5                                                                
CONECT   18    5                                                                
CONECT   19    6                                                                
CONECT   20    7                                                                
CONECT   25  636                                                                
CONECT   91  305                                                                
CONECT  113  128                                                                
CONECT  123  124  131  132                                                      
CONECT  124  123  125  129  134                                                 
CONECT  125  124  126  135  136                                                 
CONECT  126  125  127  137  138                                                 
CONECT  127  126  128  139  140                                                 
CONECT  128  113  127  141                                                      
CONECT  129  124  130  142                                                      
CONECT  130  129                                                                
CONECT  131  123                                                                
CONECT  132  123                                                                
CONECT  134  124                                                                
CONECT  135  125                                                                
CONECT  136  125                                                                
CONECT  137  126                                                                
CONECT  138  126                                                                
CONECT  139  127                                                                
CONECT  140  127                                                                
CONECT  141  128                                                                
CONECT  142  129                                                                
CONECT  173  190                                                                
CONECT  190  173  191  194                                                      
CONECT  191  190  192  204  205                                                 
CONECT  192  191  193  212                                                      
CONECT  193  192                                                                
CONECT  194  190  200  206  207                                                 
CONECT  195  196  200  201                                                      
CONECT  196  195  197  208                                                      
CONECT  197  196  198  209                                                      
CONECT  198  197  199  210                                                      
CONECT  199  198  200  211                                                      
CONECT  200  194  195  199                                                      
CONECT  201  195  202  203                                                      
CONECT  202  201                                                                
CONECT  203  201                                                                
CONECT  204  191                                                                
CONECT  205  191                                                                
CONECT  206  194                                                                
CONECT  207  194                                                                
CONECT  208  196                                                                
CONECT  209  197                                                                
CONECT  210  198                                                                
CONECT  211  199                                                                
CONECT  212  192                                                                
CONECT  215  245                                                                
CONECT  245  215  246  253                                                      
CONECT  246  245  247  251  254                                                 
CONECT  247  246  248  255  256                                                 
CONECT  248  247  249  257  258                                                 
CONECT  249  248  250  259  260                                                 
CONECT  250  249  261  262                                                      
CONECT  251  246  252  264                                                      
CONECT  252  251                                                                
CONECT  253  245                                                                
CONECT  254  246                                                                
CONECT  255  247                                                                
CONECT  256  247                                                                
CONECT  257  248                                                                
CONECT  258  248                                                                
CONECT  259  249                                                                
CONECT  260  249                                                                
CONECT  261  250                                                                
CONECT  262  250                                                                
CONECT  264  251                                                                
CONECT  266    6                                                                
CONECT  281  282  290                                                           
CONECT  282  281  283  287  292                                                 
CONECT  283  282  284  293  294                                                 
CONECT  284  283  285  295  296                                                 
CONECT  285  284  286  297  298                                                 
CONECT  286  285  299  531                                                      
CONECT  287  282  288  300                                                      
CONECT  288  287                                                                
CONECT  290  281                                                                
CONECT  292  282                                                                
CONECT  293  283                                                                
CONECT  294  283                                                                
CONECT  295  284                                                                
CONECT  296  284                                                                
CONECT  297  285                                                                
CONECT  298  285                                                                
CONECT  299  286                                                                
CONECT  300  287                                                                
CONECT  305   91                                                                
CONECT  370  570                                                                
CONECT  392  407                                                                
CONECT  402  403  410  411                                                      
CONECT  403  402  404  408  413                                                 
CONECT  404  403  405  414  415                                                 
CONECT  405  404  406  416  417                                                 
CONECT  406  405  407  418  419                                                 
CONECT  407  392  406  420                                                      
CONECT  408  403  409  421                                                      
CONECT  409  408                                                                
CONECT  410  402                                                                
CONECT  411  402                                                                
CONECT  413  403                                                                
CONECT  414  404                                                                
CONECT  415  404                                                                
CONECT  416  405                                                                
CONECT  417  405                                                                
CONECT  418  406                                                                
CONECT  419  406                                                                
CONECT  420  407                                                                
CONECT  421  408                                                                
CONECT  452  469                                                                
CONECT  469  452  470  473                                                      
CONECT  470  469  471  483  484                                                 
CONECT  471  470  472  491                                                      
CONECT  472  471                                                                
CONECT  473  469  479  485  486                                                 
CONECT  474  475  479  480                                                      
CONECT  475  474  476  487                                                      
CONECT  476  475  477  488                                                      
CONECT  477  476  478  489                                                      
CONECT  478  477  479  490                                                      
CONECT  479  473  474  478                                                      
CONECT  480  474  481  482                                                      
CONECT  481  480                                                                
CONECT  482  480                                                                
CONECT  483  470                                                                
CONECT  484  470                                                                
CONECT  485  473                                                                
CONECT  486  473                                                                
CONECT  487  475                                                                
CONECT  488  476                                                                
CONECT  489  477                                                                
CONECT  490  478                                                                
CONECT  491  471                                                                
CONECT  493  510                                                                
CONECT  510  493  511  518                                                      
CONECT  511  510  512  516  519                                                 
CONECT  512  511  513  520  521                                                 
CONECT  513  512  514  522  523                                                 
CONECT  514  513  515  524  525                                                 
CONECT  515  514  526  527                                                      
CONECT  516  511  517  529                                                      
CONECT  517  516                                                                
CONECT  518  510                                                                
CONECT  519  511                                                                
CONECT  520  512                                                                
CONECT  521  512                                                                
CONECT  522  513                                                                
CONECT  523  513                                                                
CONECT  524  514                                                                
CONECT  525  514                                                                
CONECT  526  515                                                                
CONECT  527  515                                                                
CONECT  529  516                                                                
CONECT  531  286                                                                
CONECT  546  547  555                                                           
CONECT  547  546  548  552  557                                                 
CONECT  548  547  549  558  559                                                 
CONECT  549  548  550  560  561                                                 
CONECT  550  549  551  562  563                                                 
CONECT  551  550  564  797                                                      
CONECT  552  547  553  565                                                      
CONECT  553  552                                                                
CONECT  555  546                                                                
CONECT  557  547                                                                
CONECT  558  548                                                                
CONECT  559  548                                                                
CONECT  560  549                                                                
CONECT  561  549                                                                
CONECT  562  550                                                                
CONECT  563  550                                                                
CONECT  564  551                                                                
CONECT  565  552                                                                
CONECT  570  370                                                                
CONECT  636   25                                                                
CONECT  658  673                                                                
CONECT  668  669  676  677                                                      
CONECT  669  668  670  674  679                                                 
CONECT  670  669  671  680  681                                                 
CONECT  671  670  672  682  683                                                 
CONECT  672  671  673  684  685                                                 
CONECT  673  658  672  686                                                      
CONECT  674  669  675  687                                                      
CONECT  675  674                                                                
CONECT  676  668                                                                
CONECT  677  668                                                                
CONECT  679  669                                                                
CONECT  680  670                                                                
CONECT  681  670                                                                
CONECT  682  671                                                                
CONECT  683  671                                                                
CONECT  684  672                                                                
CONECT  685  672                                                                
CONECT  686  673                                                                
CONECT  687  674                                                                
CONECT  718  735                                                                
CONECT  735  718  736  739                                                      
CONECT  736  735  737  749  750                                                 
CONECT  737  736  738  757                                                      
CONECT  738  737                                                                
CONECT  739  735  745  751  752                                                 
CONECT  740  741  745  746                                                      
CONECT  741  740  742  753                                                      
CONECT  742  741  743  754                                                      
CONECT  743  742  744  755                                                      
CONECT  744  743  745  756                                                      
CONECT  745  739  740  744                                                      
CONECT  746  740  747  748                                                      
CONECT  747  746                                                                
CONECT  748  746                                                                
CONECT  749  736                                                                
CONECT  750  736                                                                
CONECT  751  739                                                                
CONECT  752  739                                                                
CONECT  753  741                                                                
CONECT  754  742                                                                
CONECT  755  743                                                                
CONECT  756  744                                                                
CONECT  757  737                                                                
CONECT  759  776                                                                
CONECT  776  759  777  784                                                      
CONECT  777  776  778  782  785                                                 
CONECT  778  777  779  786  787                                                 
CONECT  779  778  780  788  789                                                 
CONECT  780  779  781  790  791                                                 
CONECT  781  780  792  793                                                      
CONECT  782  777  783  795                                                      
CONECT  783  782                                                                
CONECT  784  776                                                                
CONECT  785  777                                                                
CONECT  786  778                                                                
CONECT  787  778                                                                
CONECT  788  779                                                                
CONECT  789  779                                                                
CONECT  790  780                                                                
CONECT  791  780                                                                
CONECT  792  781                                                                
CONECT  793  781                                                                
CONECT  795  782                                                                
CONECT  797  551                                                                
CONECT  812  813                                                                
CONECT  813  812                                                                
CONECT  821  822  829  830  831                                                 
CONECT  822  821  823  824  825                                                 
CONECT  823  822  832                                                           
CONECT  824  822  833  834  835                                                 
CONECT  825  822  826  836  837                                                 
CONECT  826  825  827  828  838                                                 
CONECT  827  826  839                                                           
CONECT  828  826  840  841  842                                                 
CONECT  829  821                                                                
CONECT  830  821                                                                
CONECT  831  821                                                                
CONECT  832  823                                                                
CONECT  833  824                                                                
CONECT  834  824                                                                
CONECT  835  824                                                                
CONECT  836  825                                                                
CONECT  837  825                                                                
CONECT  838  826                                                                
CONECT  839  827                                                                
CONECT  840  828                                                                
CONECT  841  828                                                                
CONECT  842  828                                                                
MASTER      423    0   23    0    0    0   53    6  435    3  279    6          
END                                                                             
